# Supplementary material for: Photochemistry of Benzotriazoles: Generation of 1,3-Diradicals and Intermolecular Cycloaddition as a New Route toward Indoles and Dihydropyrrolo[3,4-b]Indoles
Source: MDPI journal article supplement (doi:10.3390/molecules191220695), 2014-12-11

# Supplementary Materials

Figure S1.  $^1\text{H}$ -NMR of 4a.

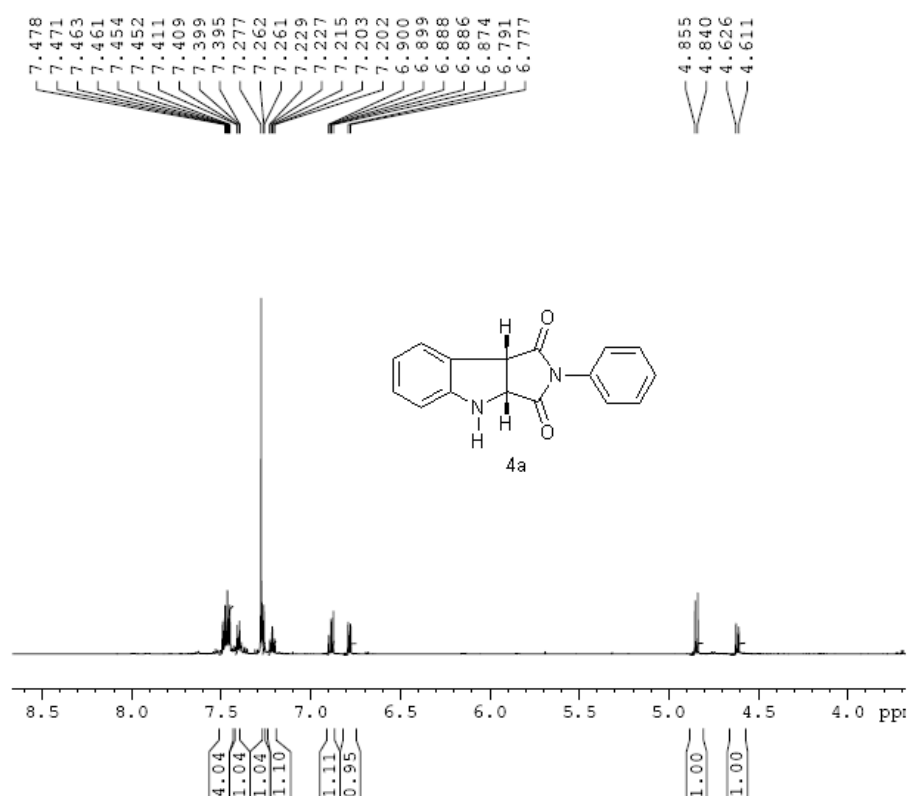

Figure S2.  $^{13}\text{C}$ -NMR of 4a.

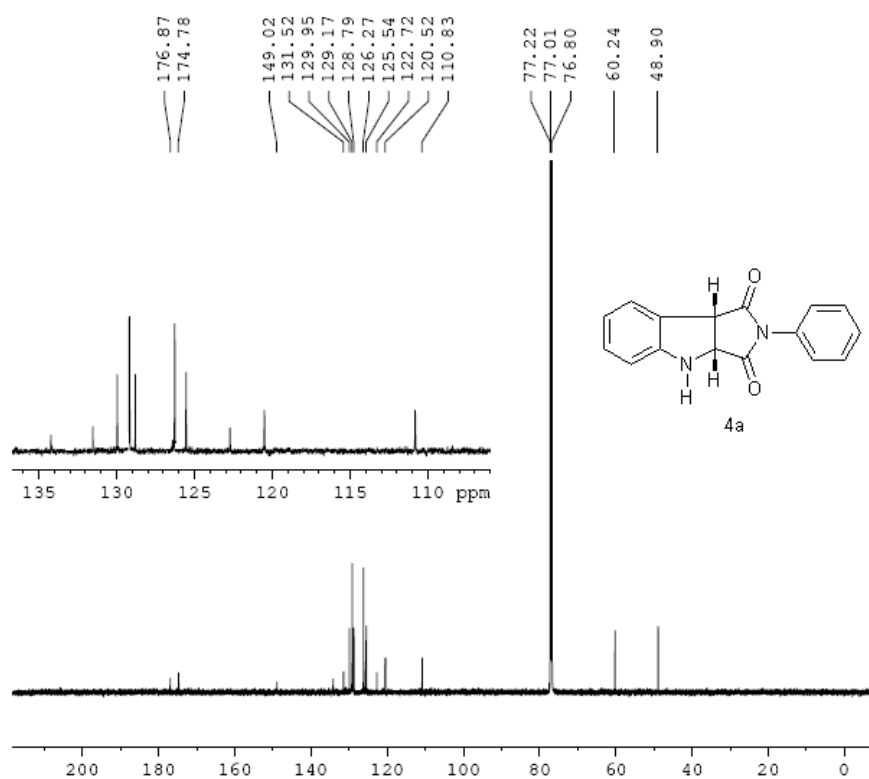

**Figure S3.**  $^1\text{H}$ -NMR and  $^{13}\text{C}$ -NMR of **4b**.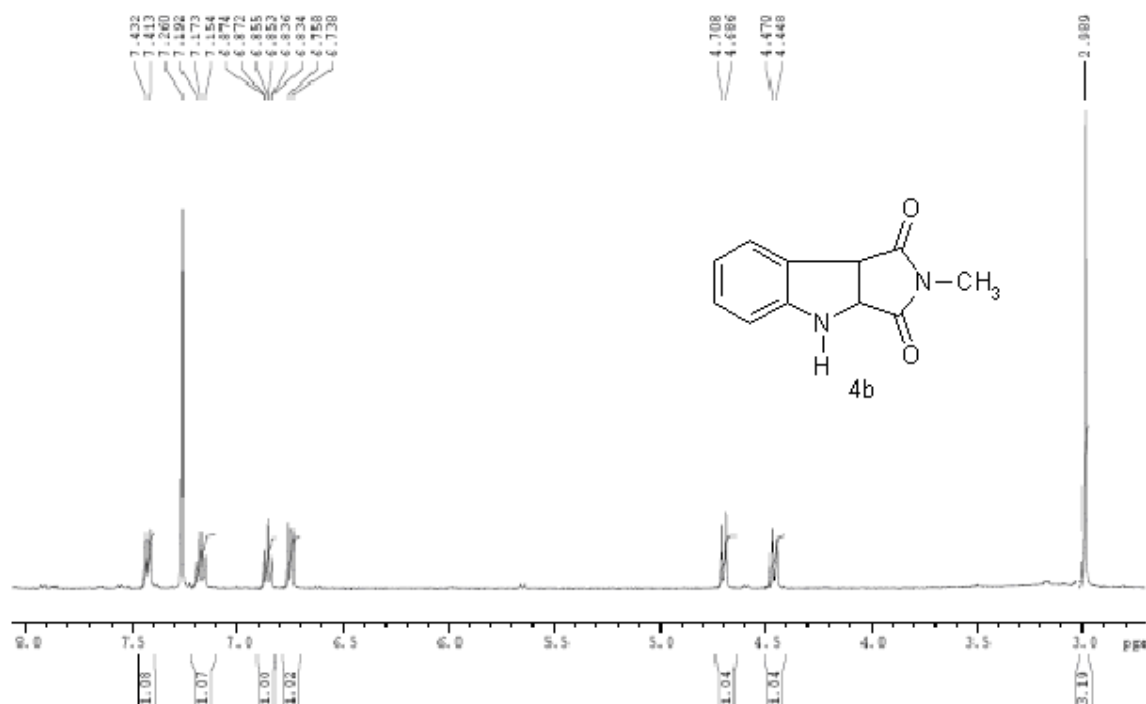**Figure S4.**  $^{13}\text{C}$ -NMR of **4b**.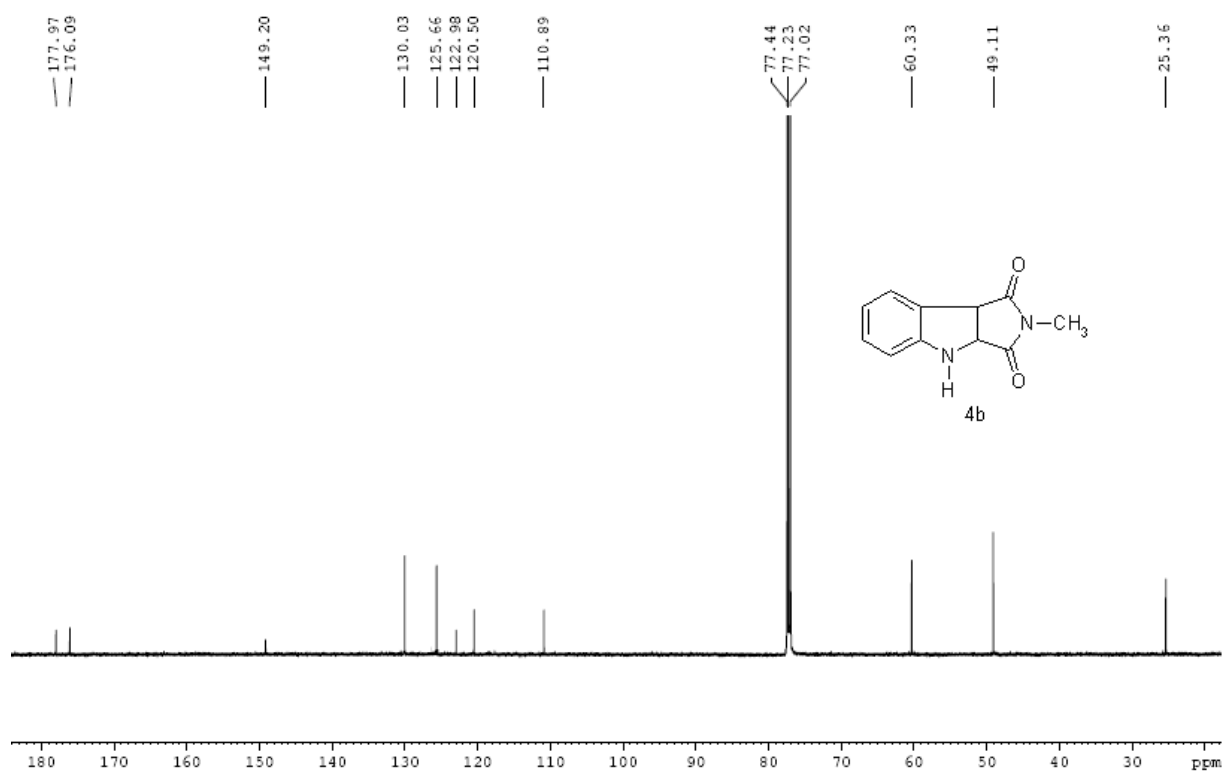

Figure S5. HSQC of 4b.

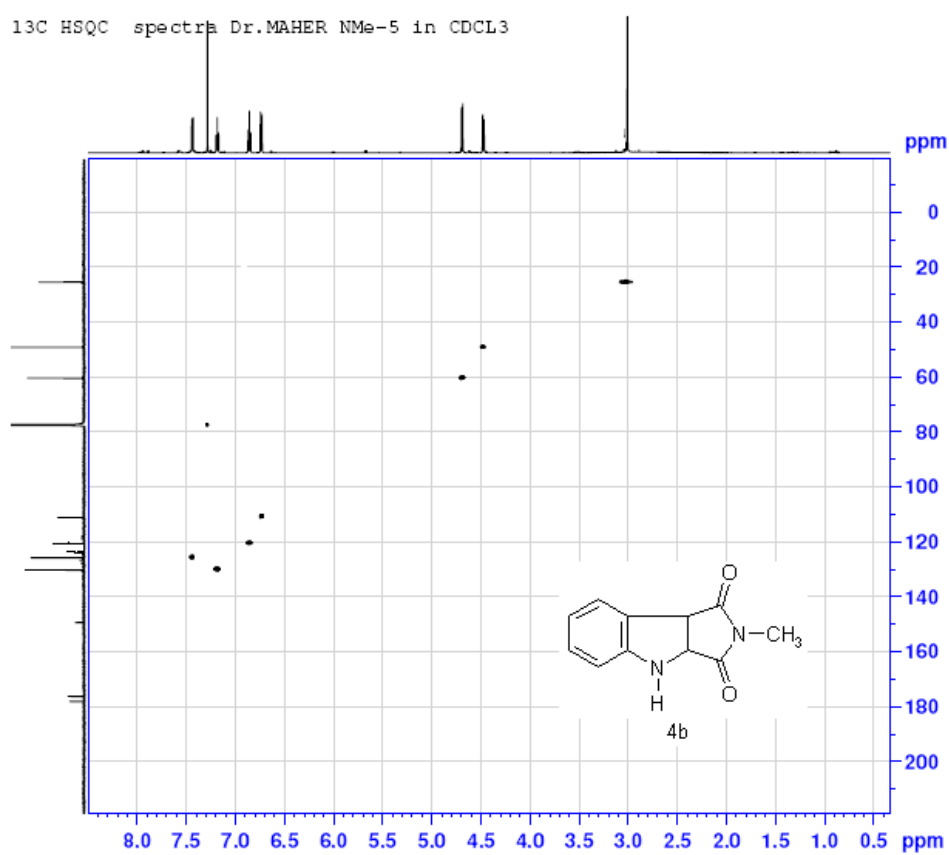

Figure S6. H,H COSY of 4b.

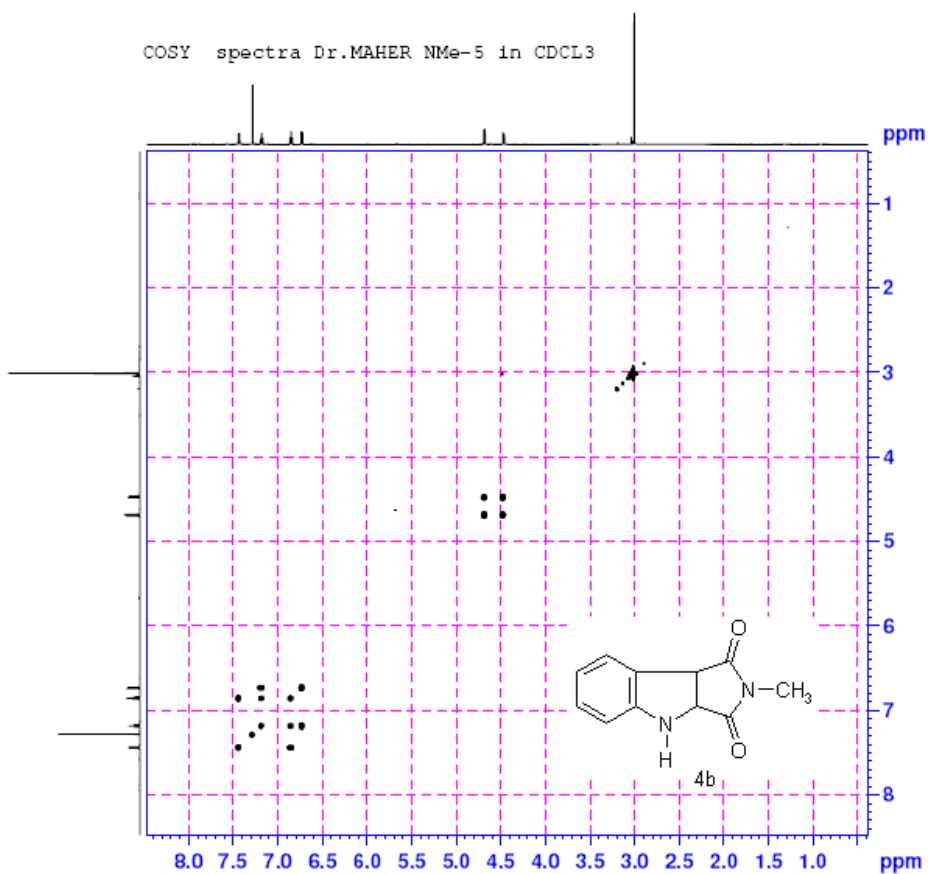

Figure S7.  $^1\text{H}$ -NMR of 4c.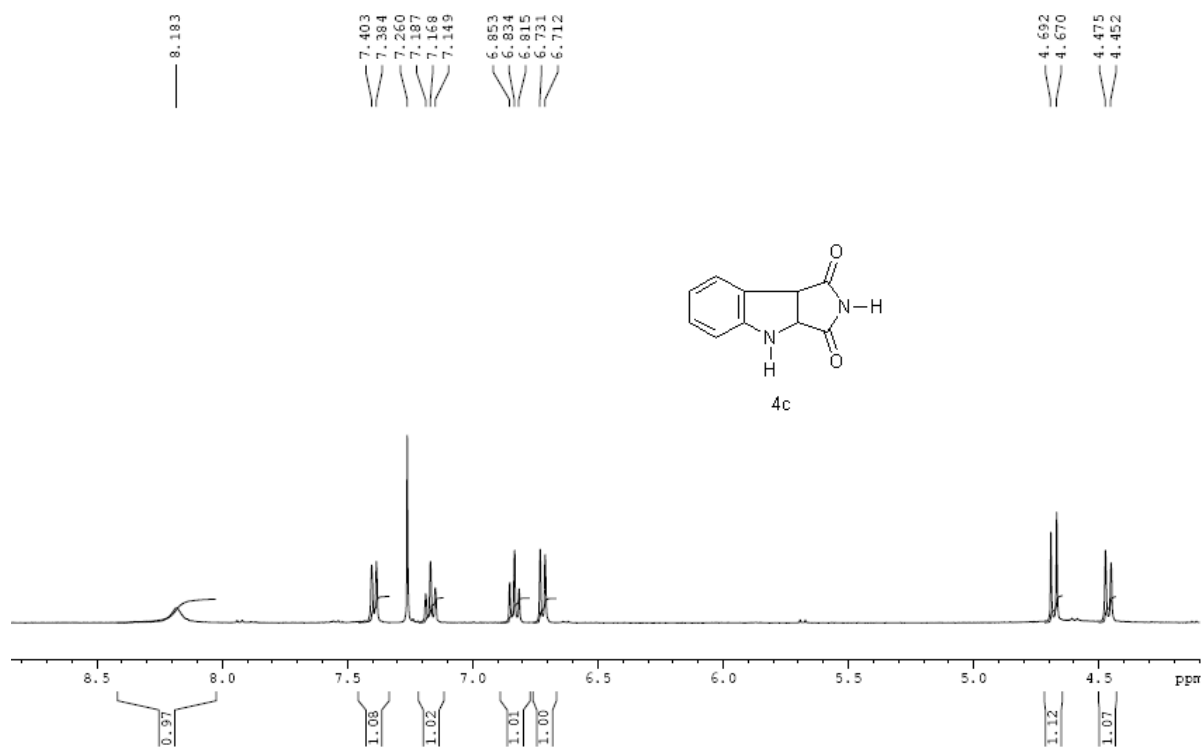Figure S8.  $^{13}\text{C}$ -NMR of 4c.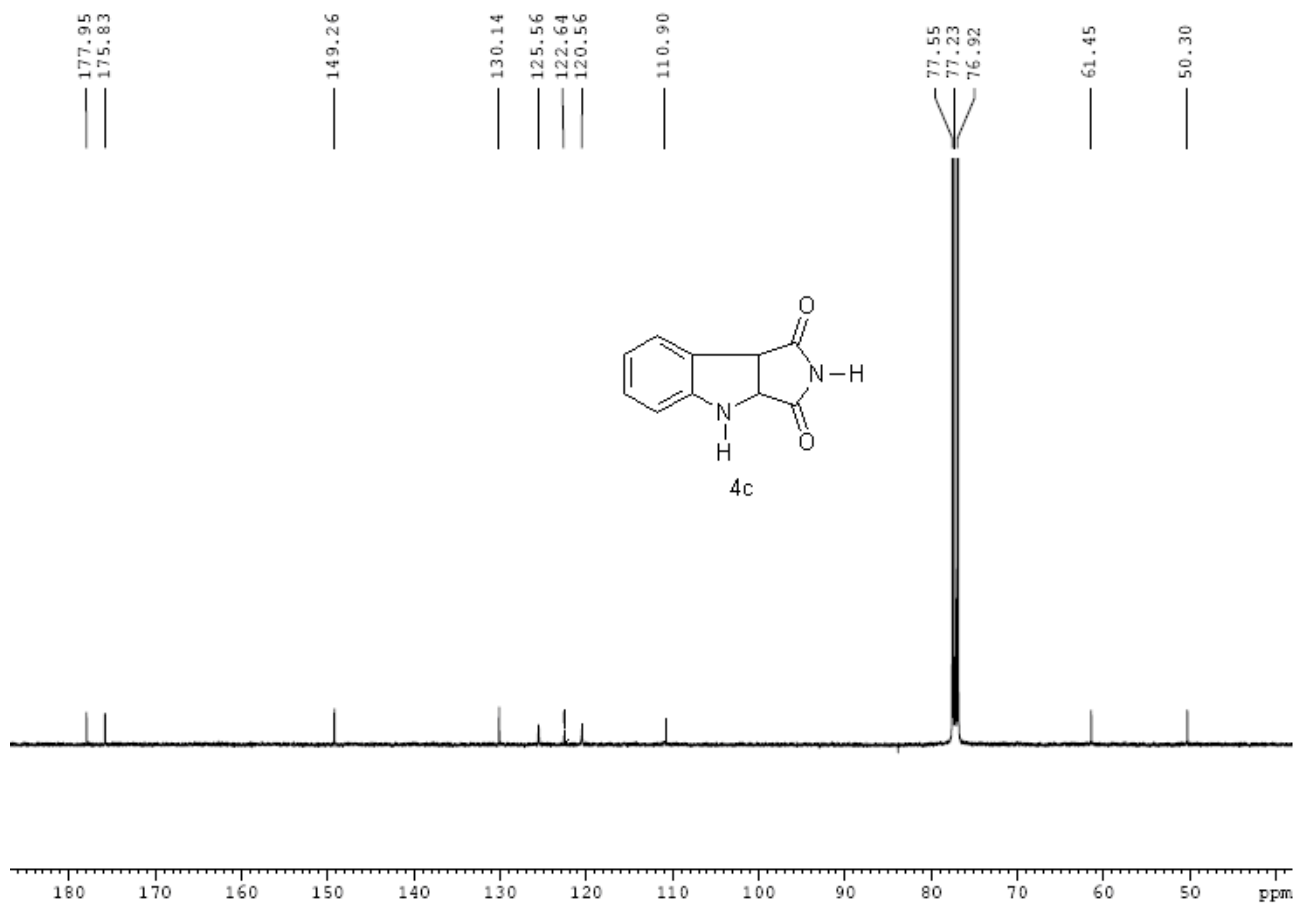

Figure S9.  $^1\text{H}$ -NMR of 4d.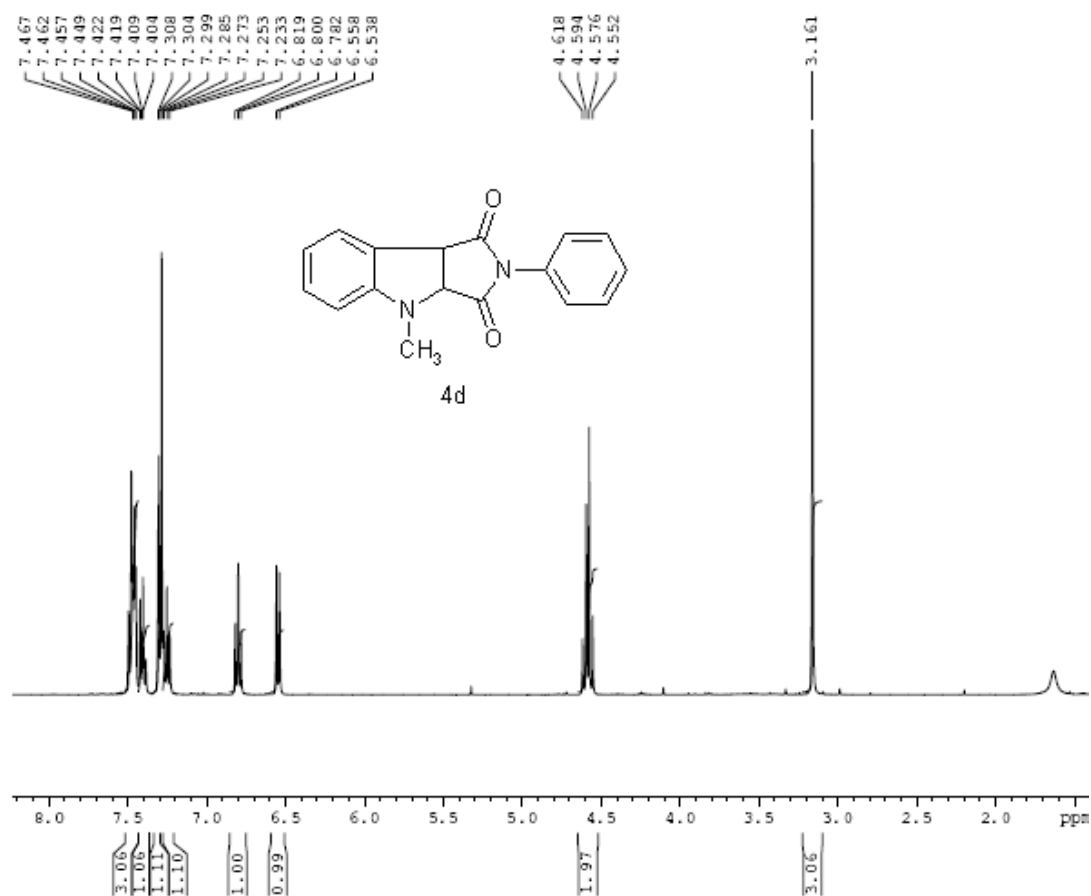Figure S10.  $^{13}\text{C}$ -NMR of 4d.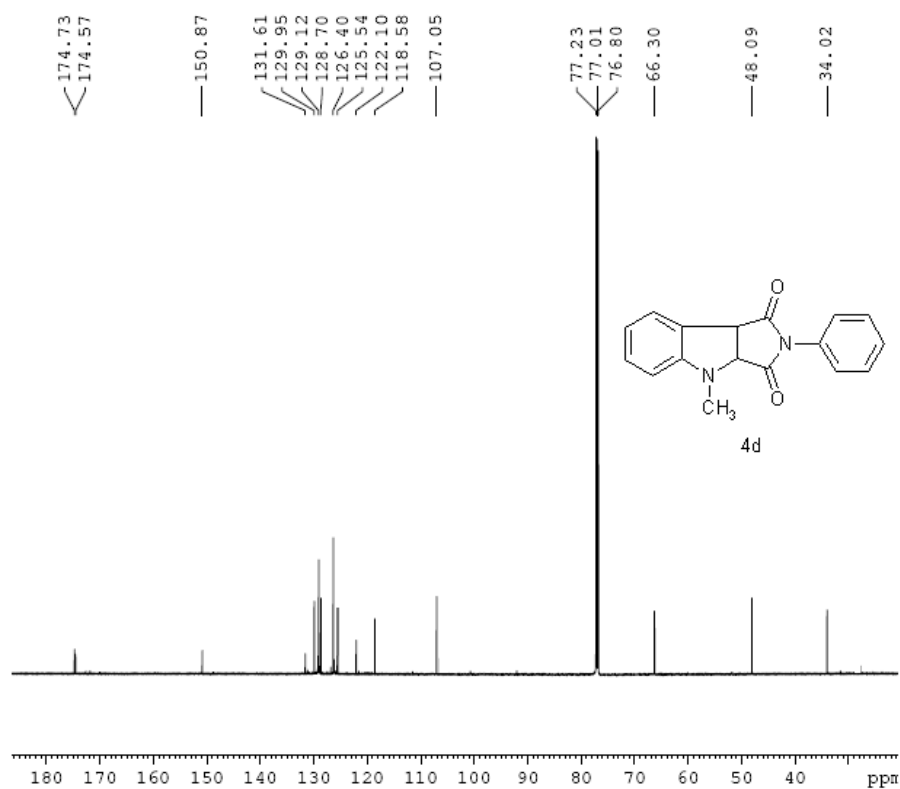

Figure S11.  $^1\text{H}$ -NMR of 4e.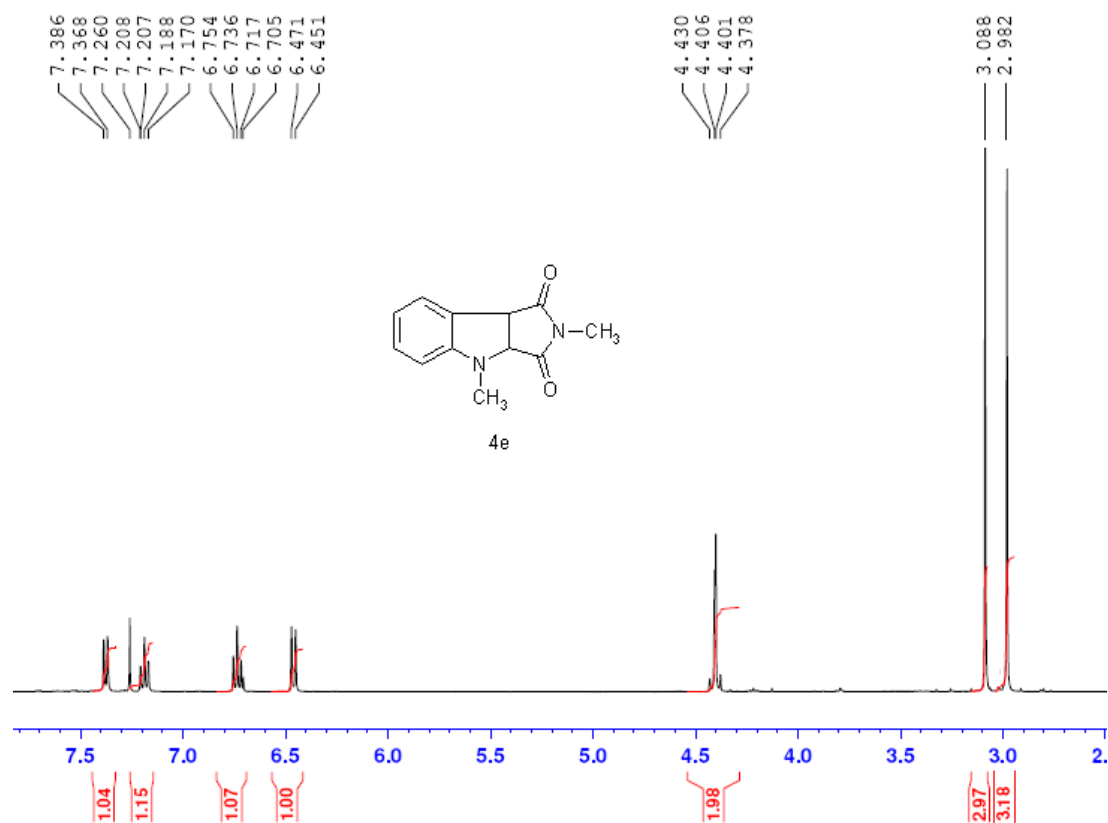Figure S12.  $^{13}\text{C}$ -NMR of 4e.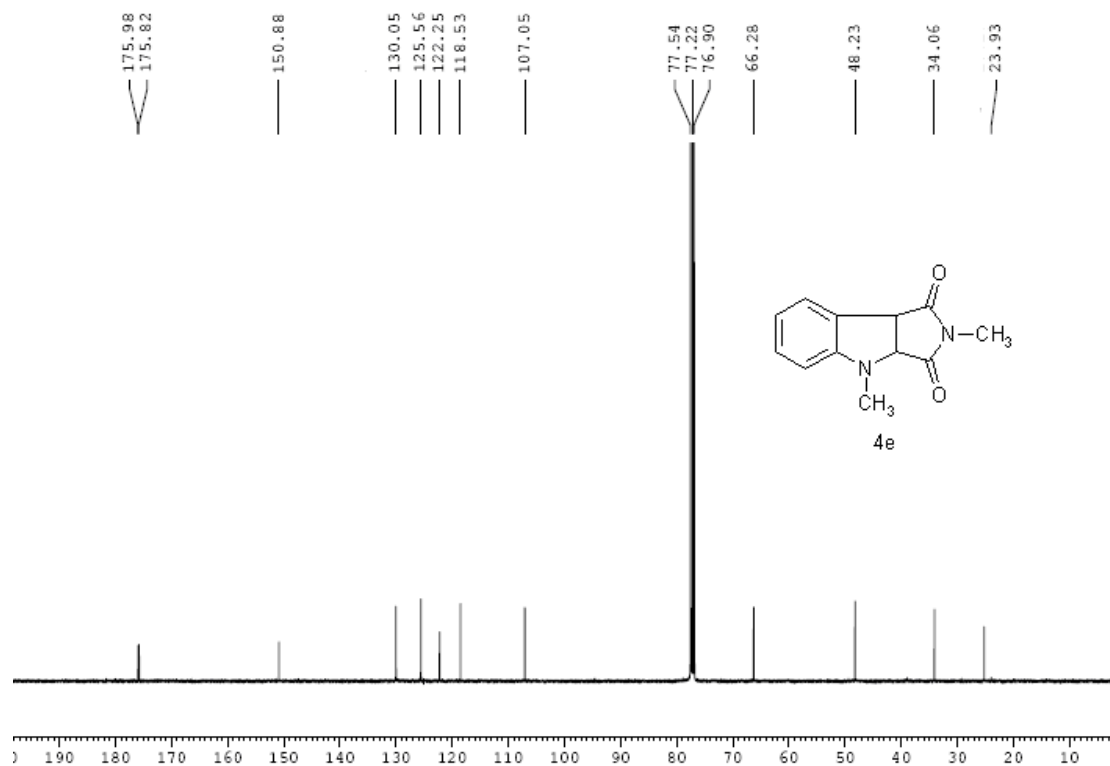

Figure S13.  $^1\text{H}$ -NMR of 4f.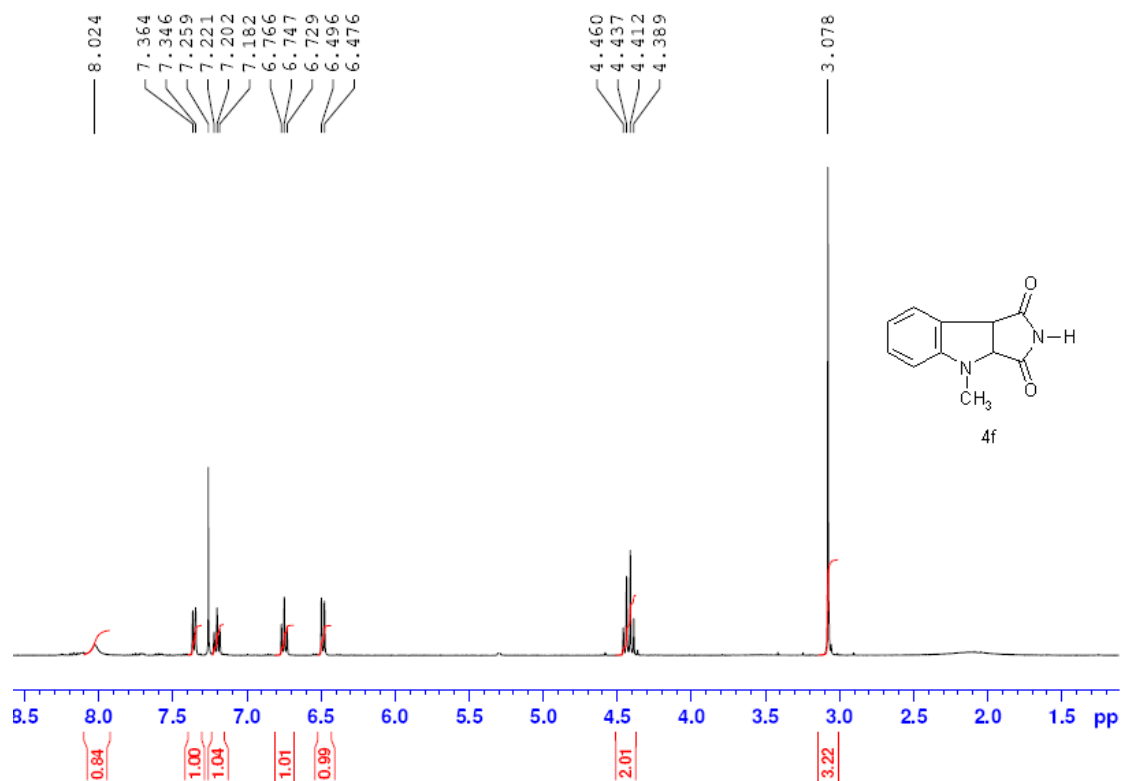Figure S14.  $^{13}\text{C}$ -NMR of 4f.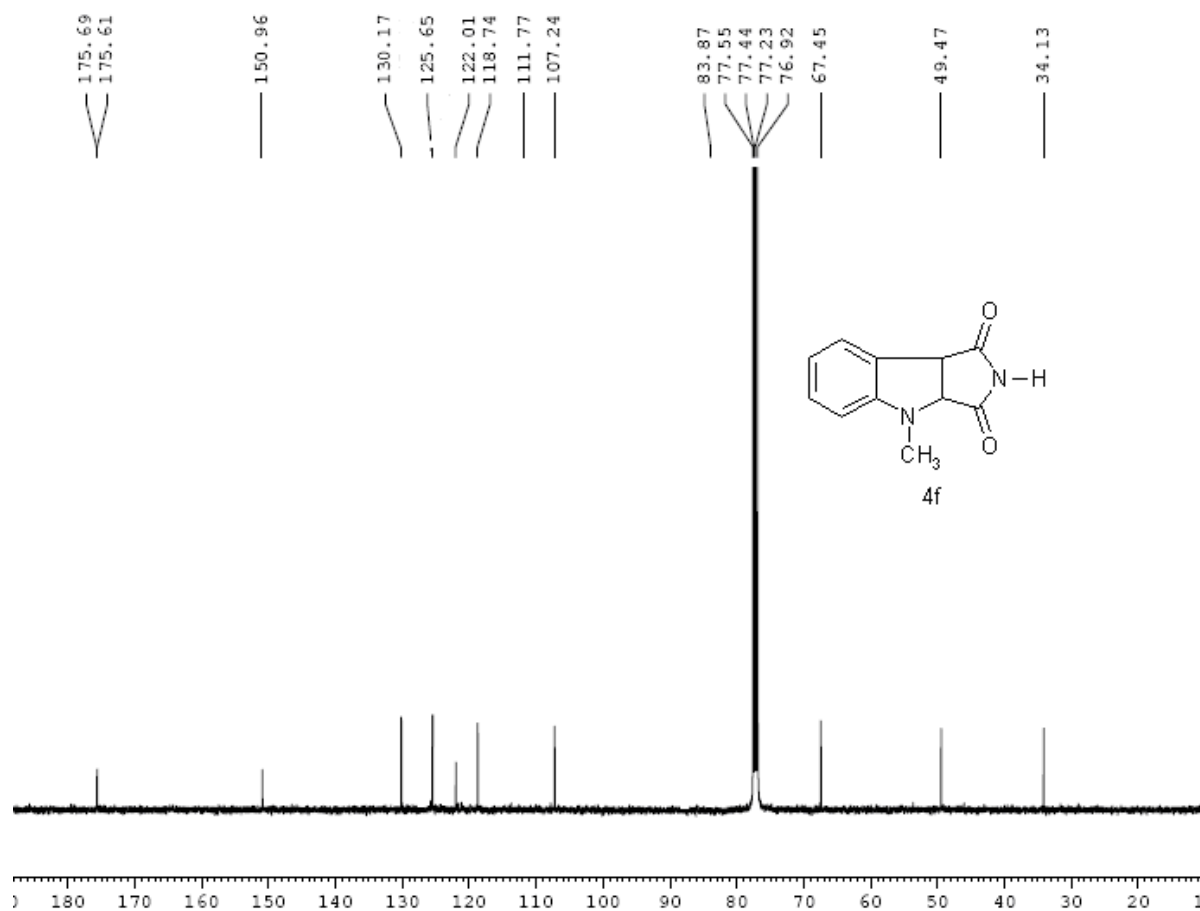

Figure S15.  $^1\text{H}$ -NMR of **4g**.

$^1\text{H}$  Spectra Dr.MAHER N Eth 11 in  $\text{CDCl}_3$

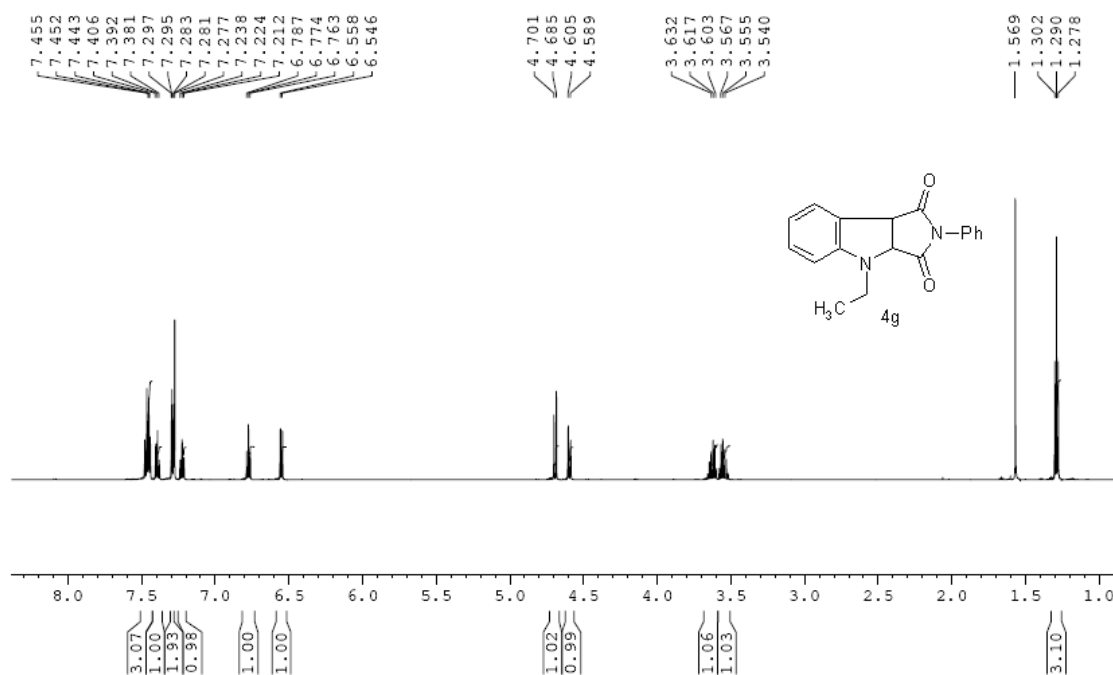Figure S16.  $^{13}\text{C}$ -NMR of **4g**.

$^{13}\text{C}$  decoupled Spectra Dr.MAHER Neth 11 in  $\text{CDCl}_3$

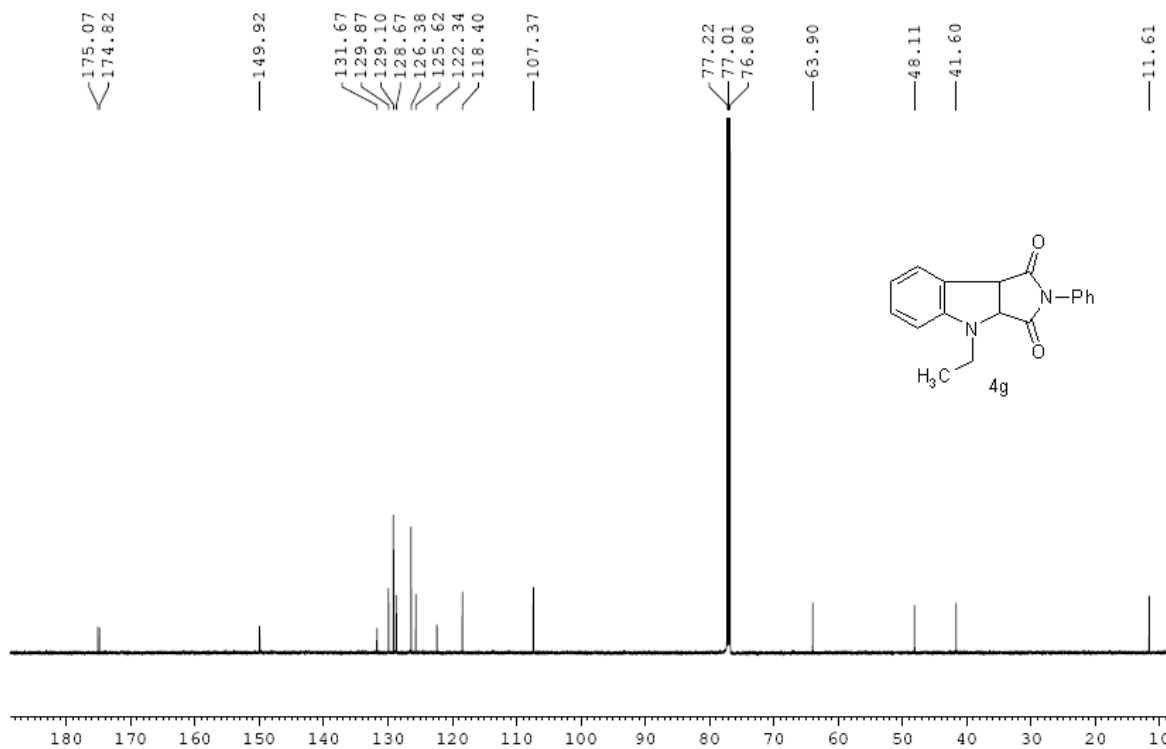



Figure S17.  $^1\text{H}$ -NMR of 4h.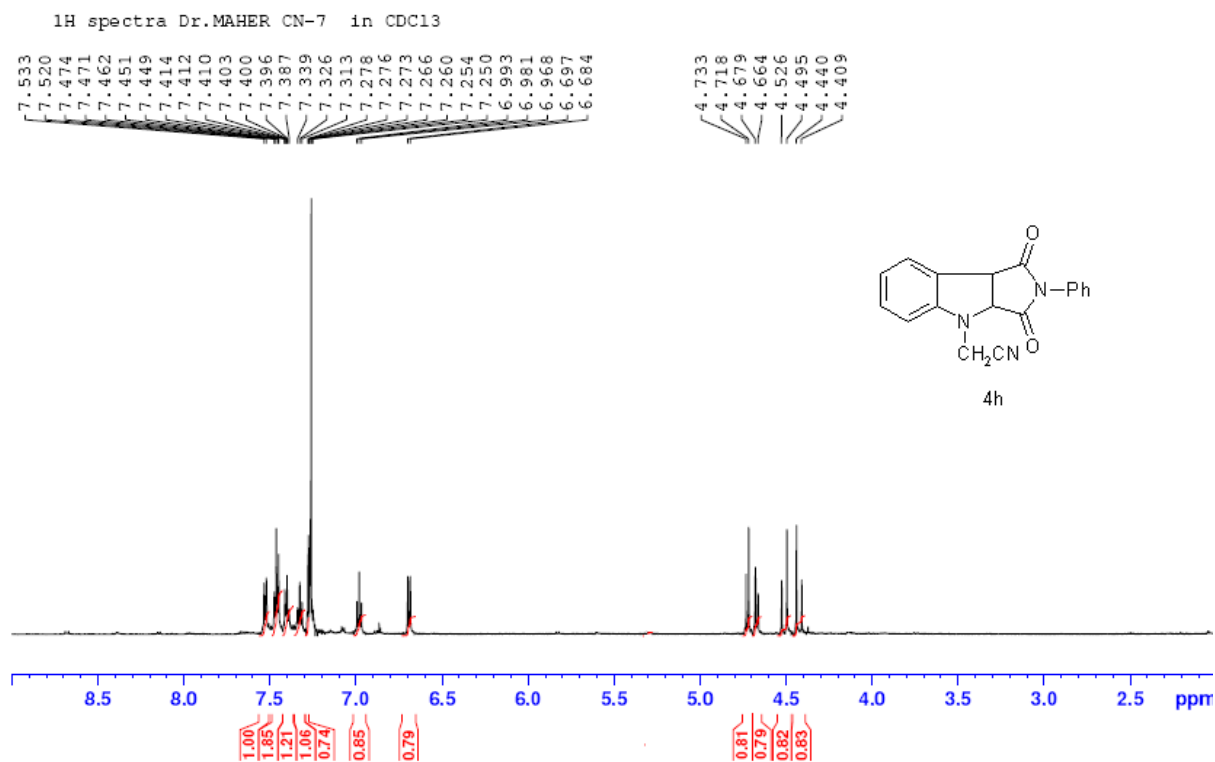Figure S18.  $^1\text{H}$ -NMR of 4i.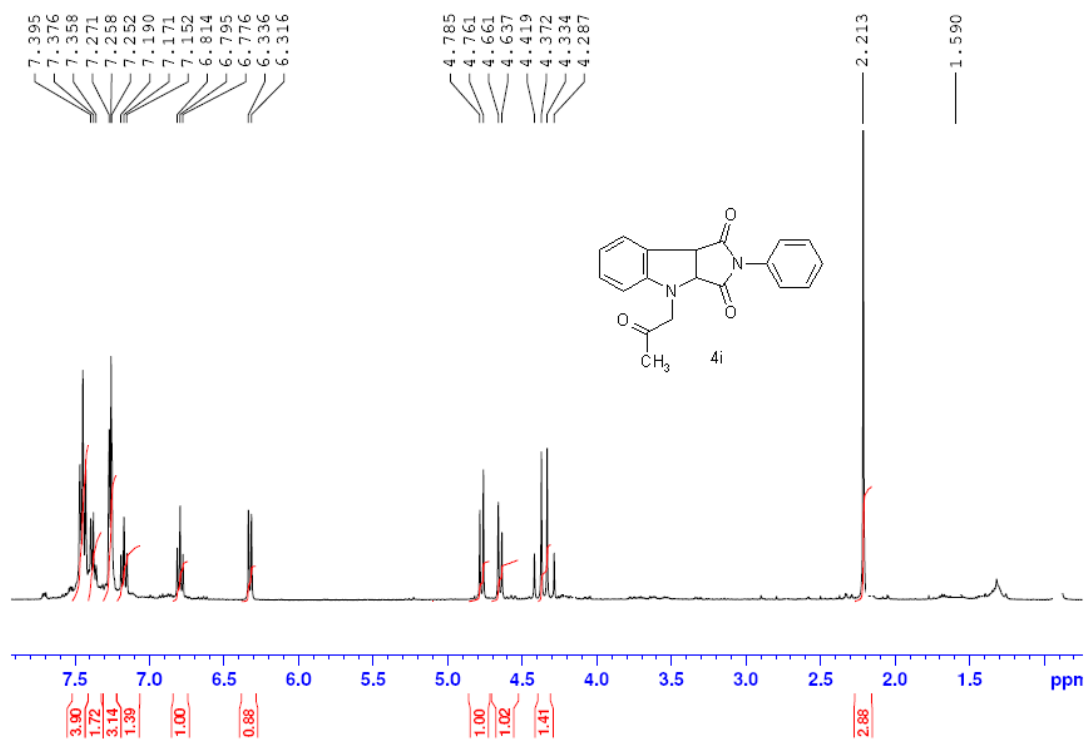

Figure S19.  $^{13}\text{C}$ -NMR of 4i.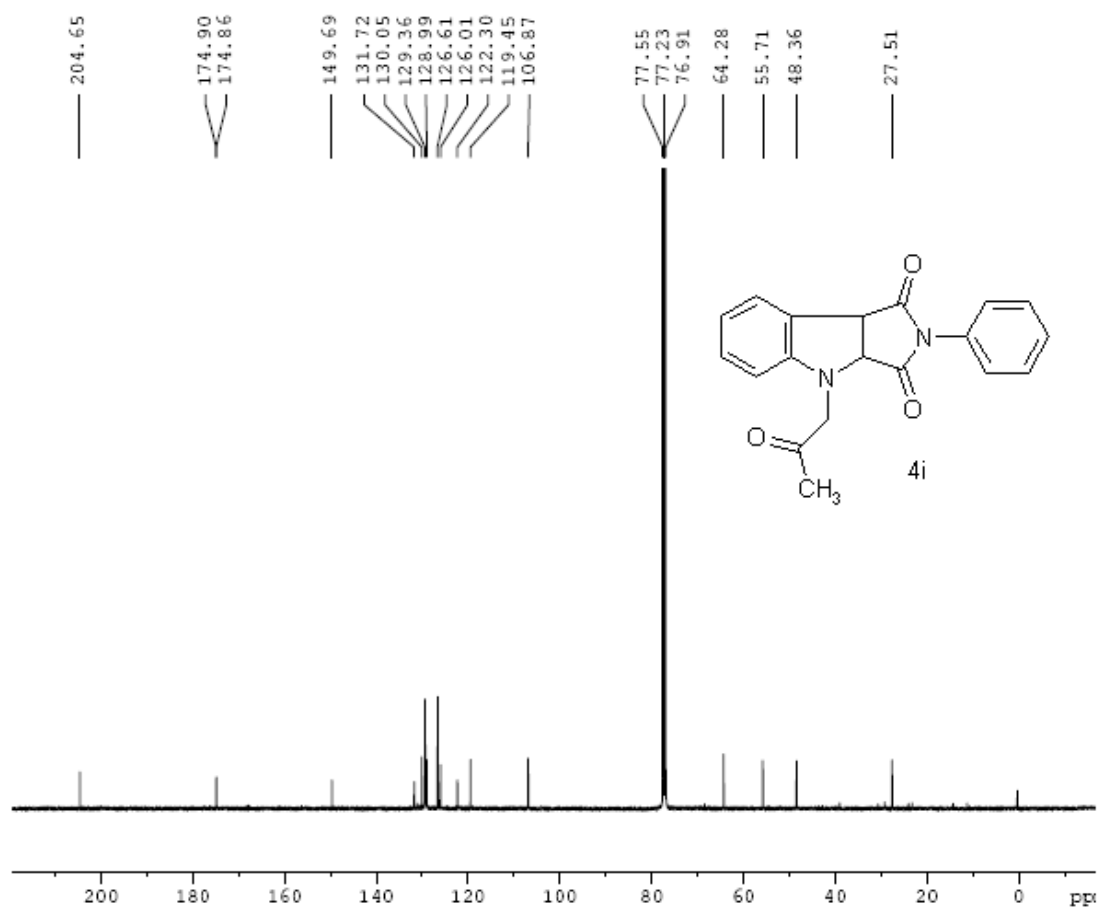Figure S20.  $^1\text{H}$ -NMR of 5.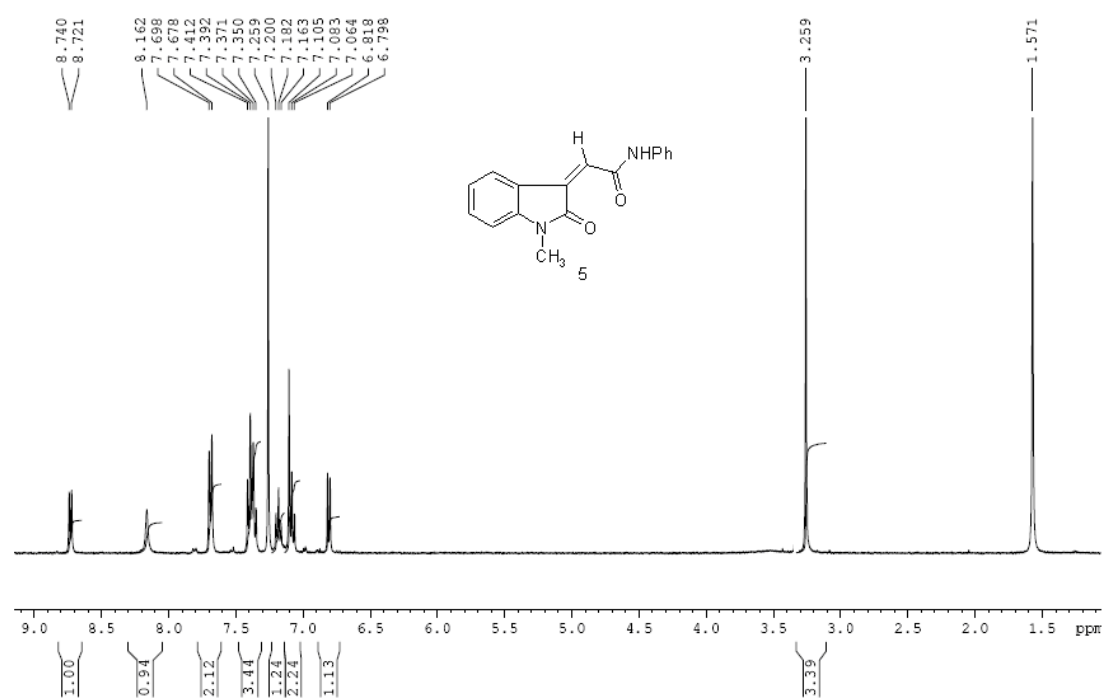

Figure S21.  $^{13}\text{C}$ -NMR of 5.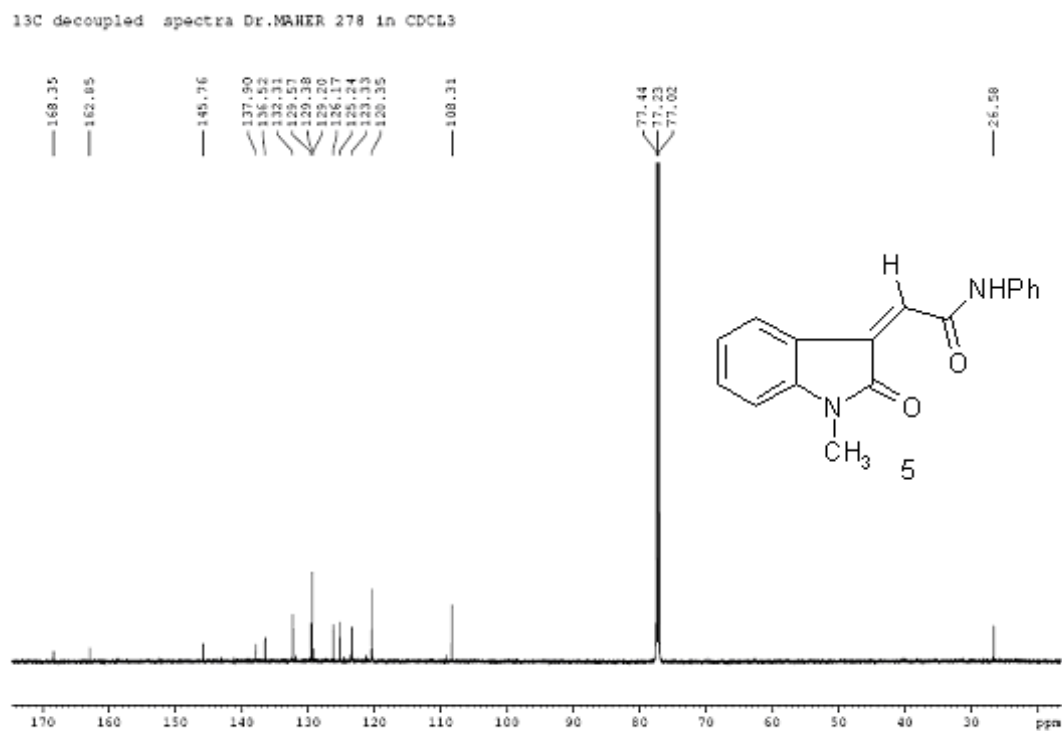Figure S22.  $^{13}\text{C}$ -NMR of 6b.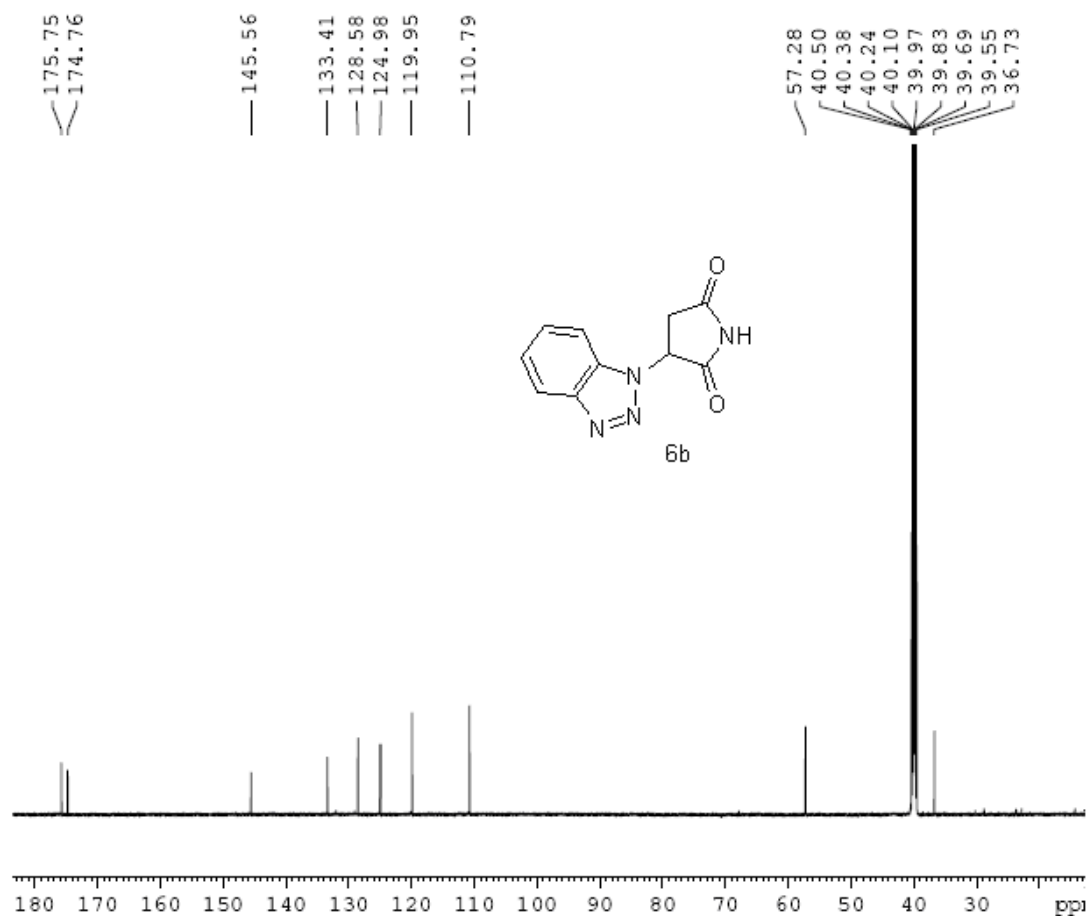

Figure S23.  $^1\text{H}$ -NMR of 7a.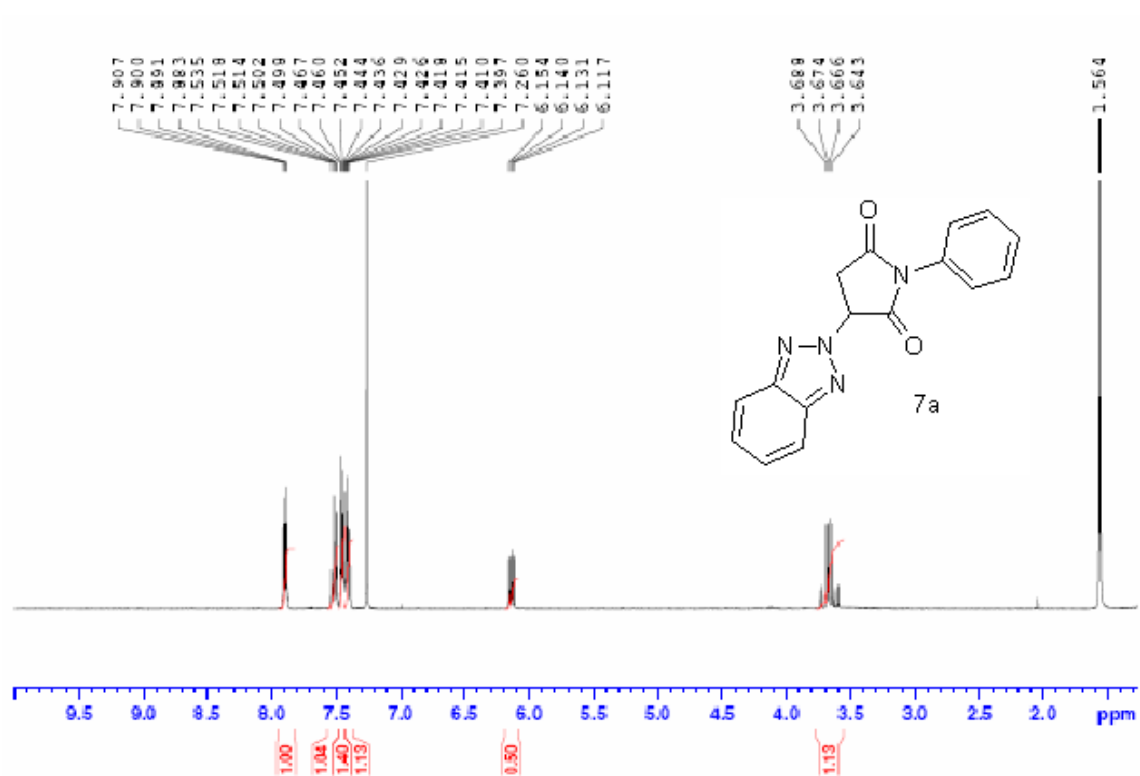Figure S24.  $^{13}\text{C}$ -NMR of 7a.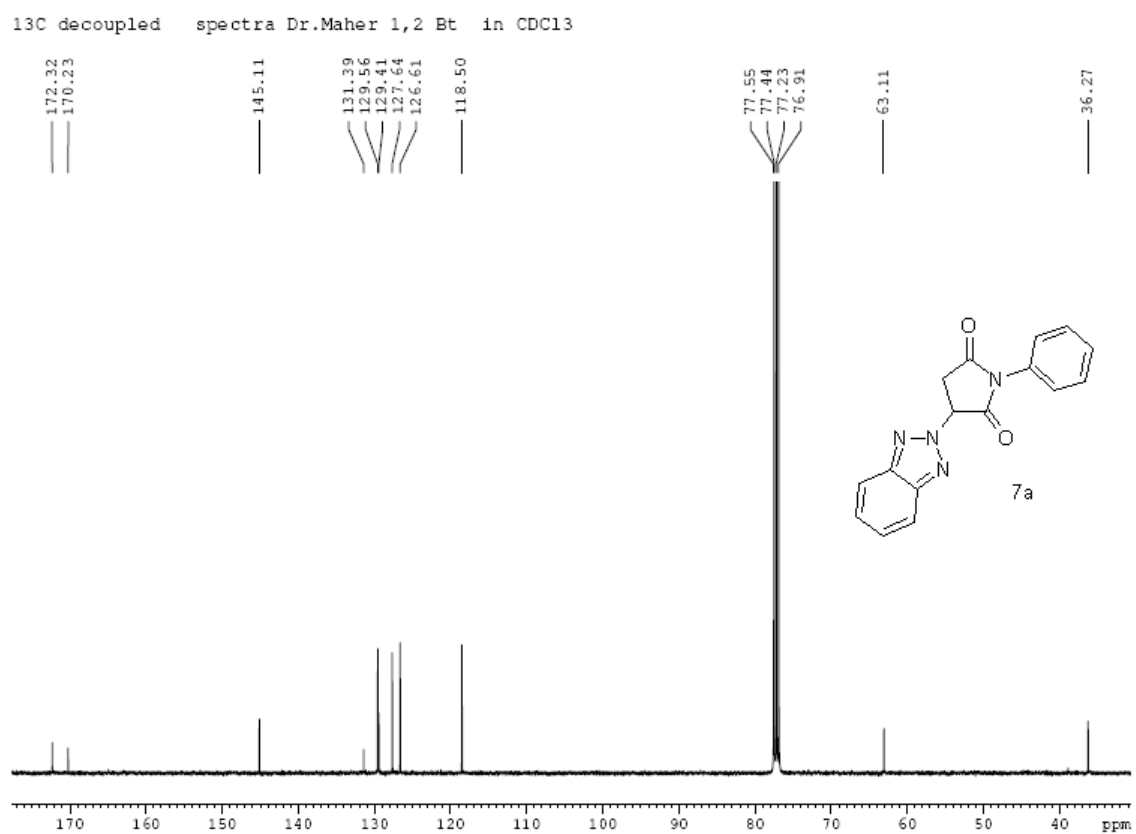

Figure S25.  $^1\text{H}$ -NMR of 7b.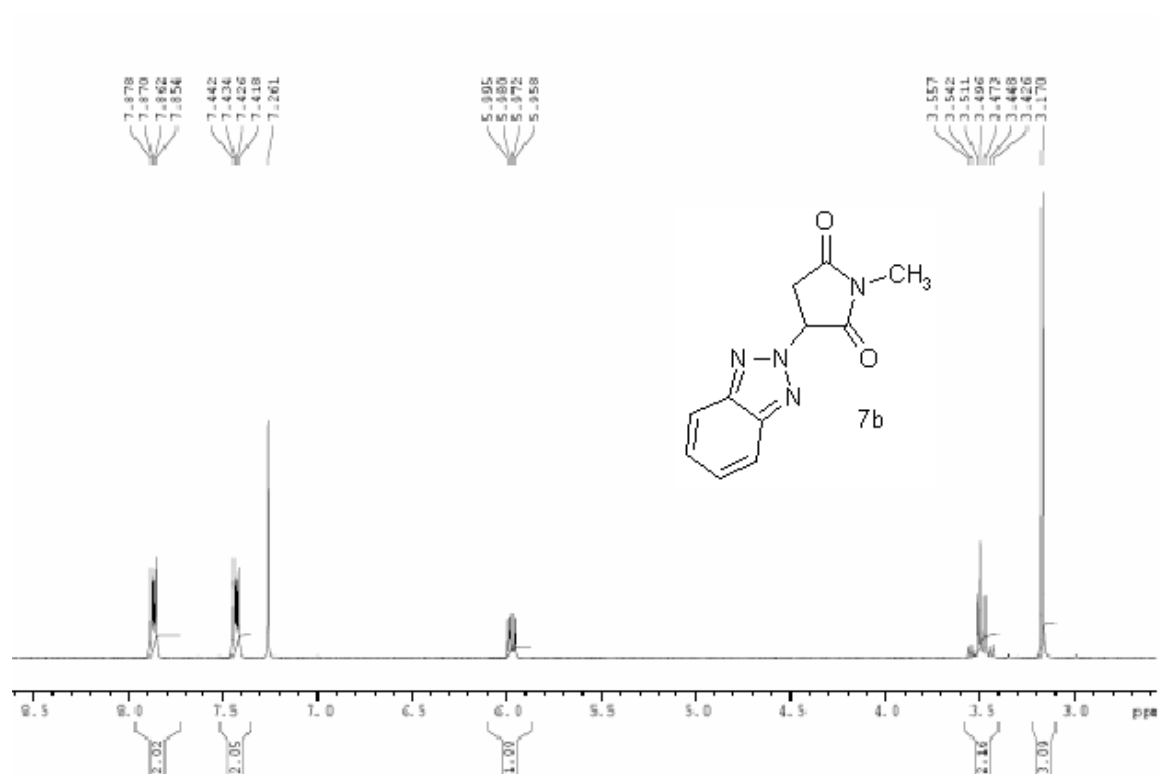Figure S26.  $^{13}\text{C}$ -NMR of 7b.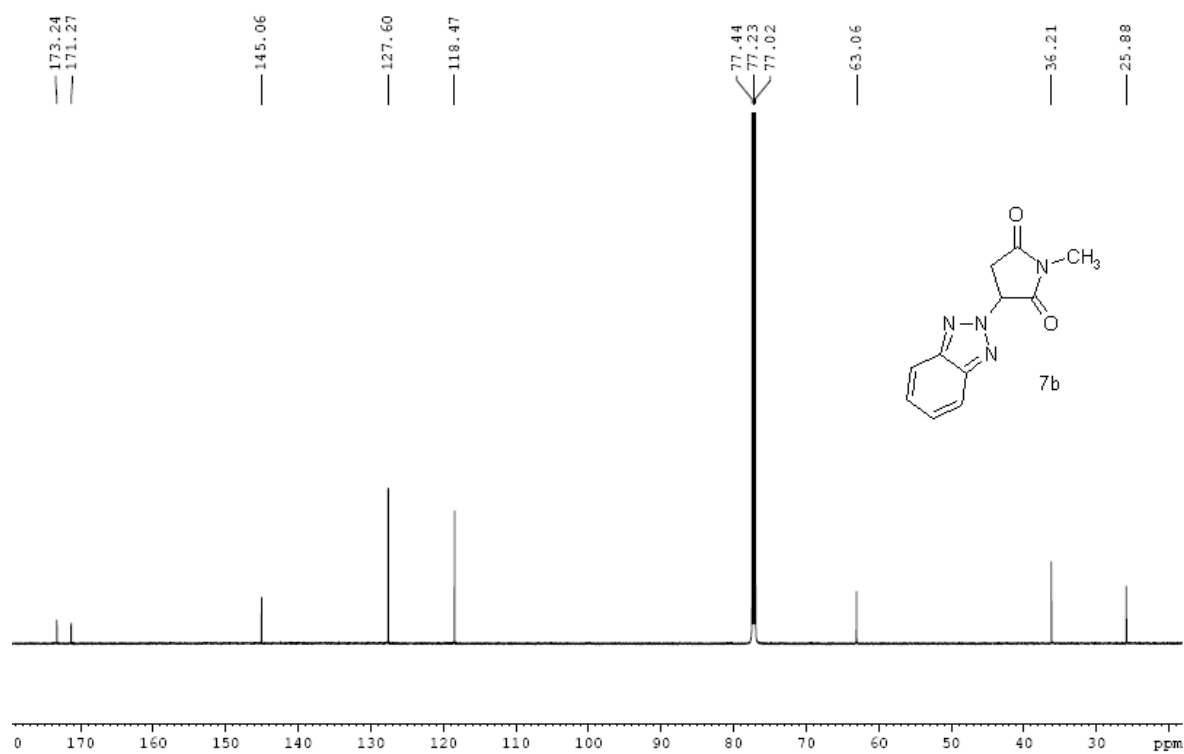

Figure S27.  $^1\text{H}$ -NMR of 7c.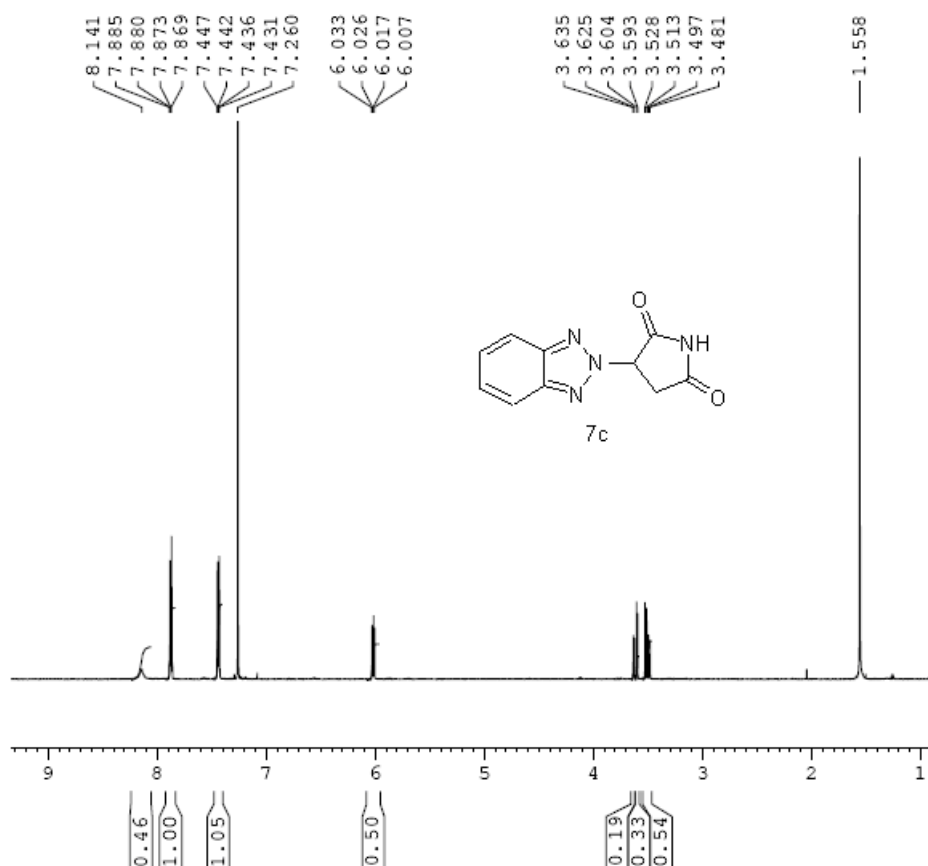Figure S28.  $^{13}\text{C}$ -NMR of 7c.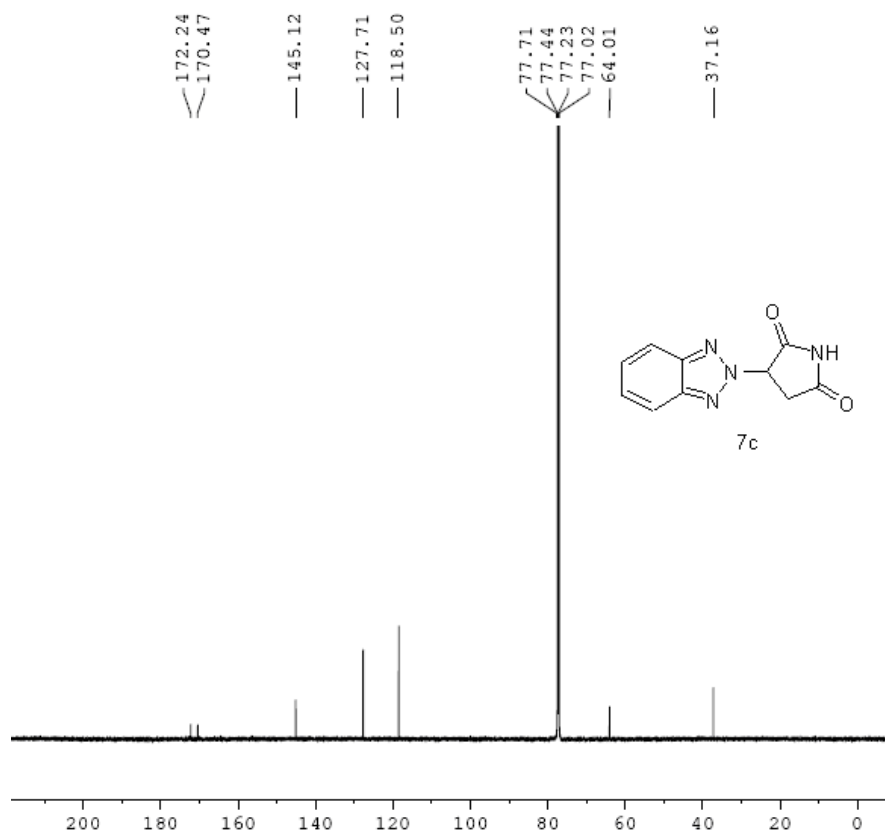

Figure S29.  $^1\text{H}$ -NMR of 9a.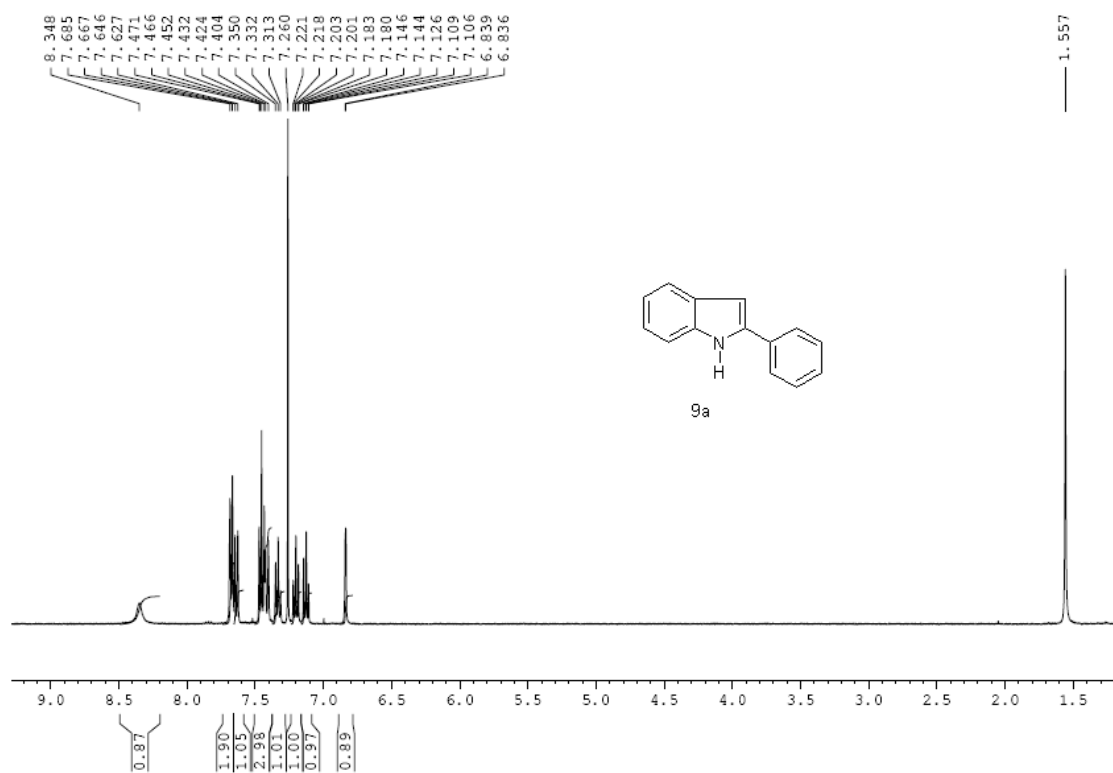Figure S30.  $^{13}\text{C}$ -NMR of 9a.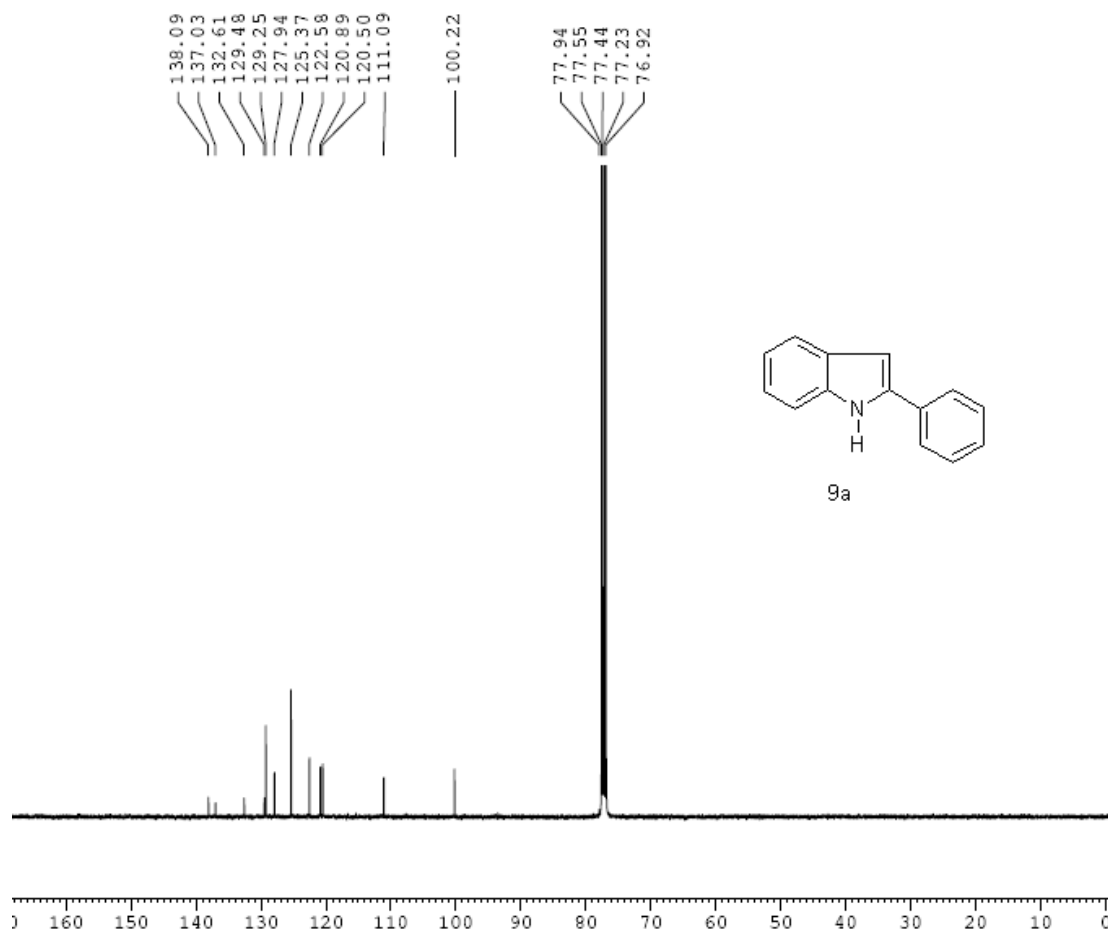

Figure S31.  $^1\text{H}$ -NMR of 9b.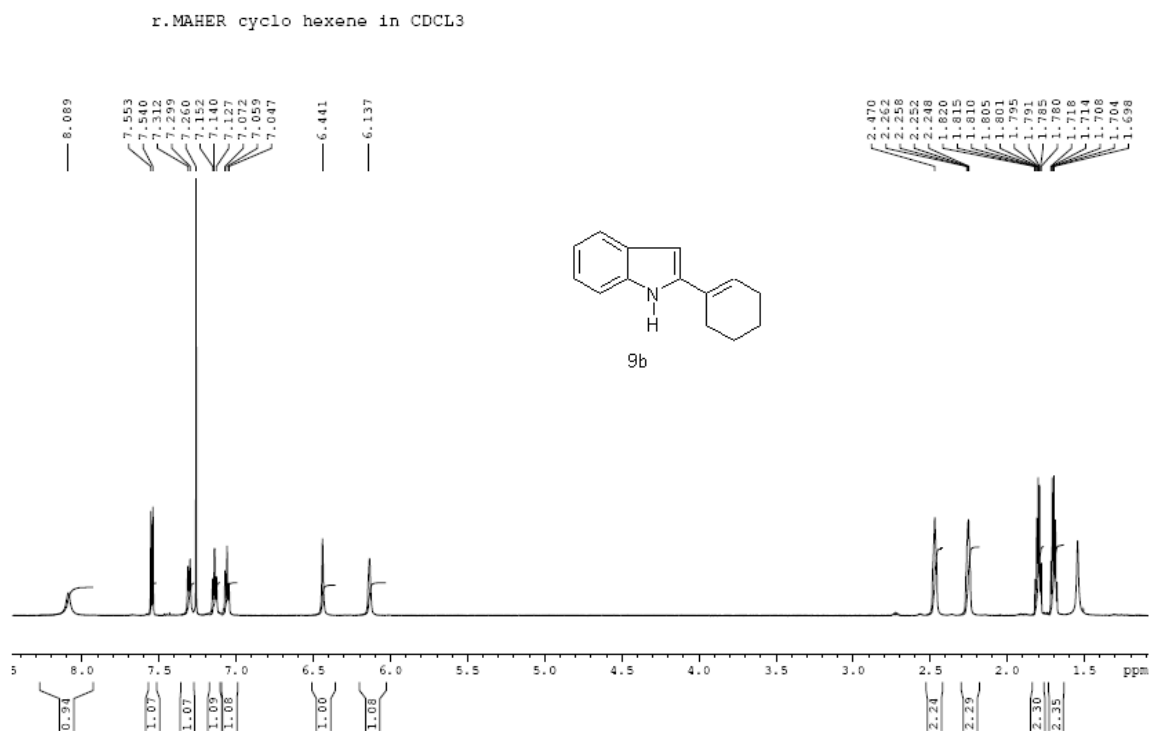Figure S32.  $^{13}\text{C}$ -NMR of 9b.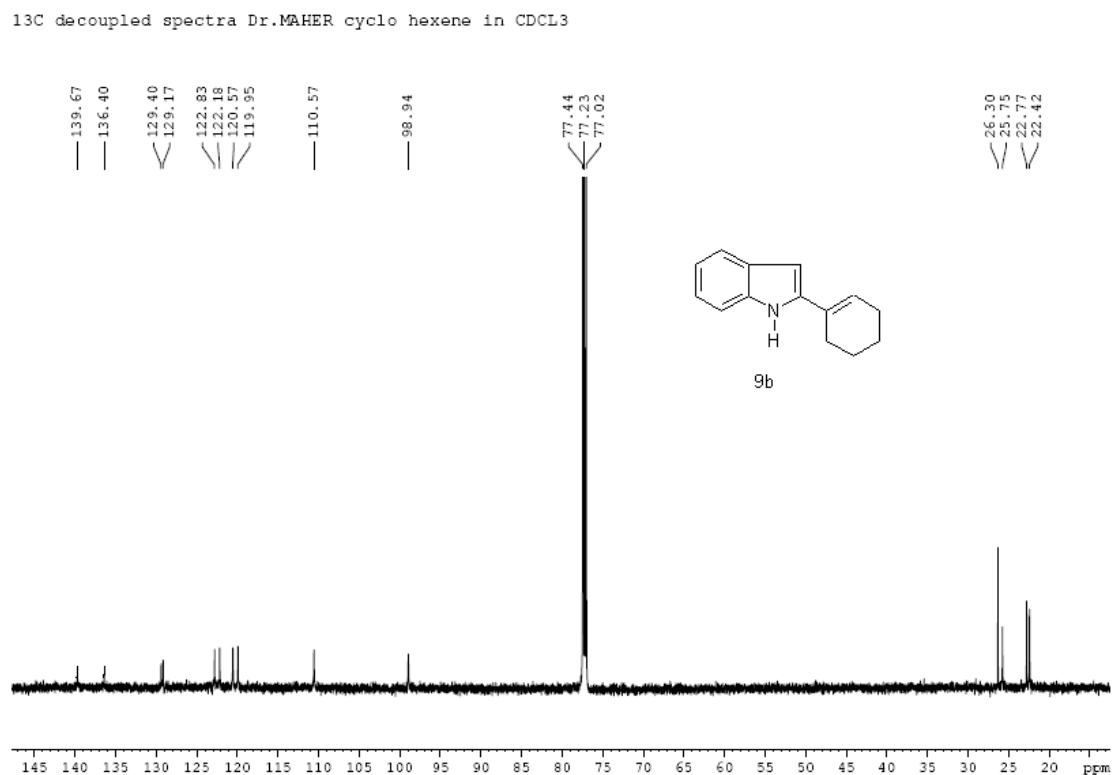



Figure S33.  $^1\text{H}$ -NMR of 9c.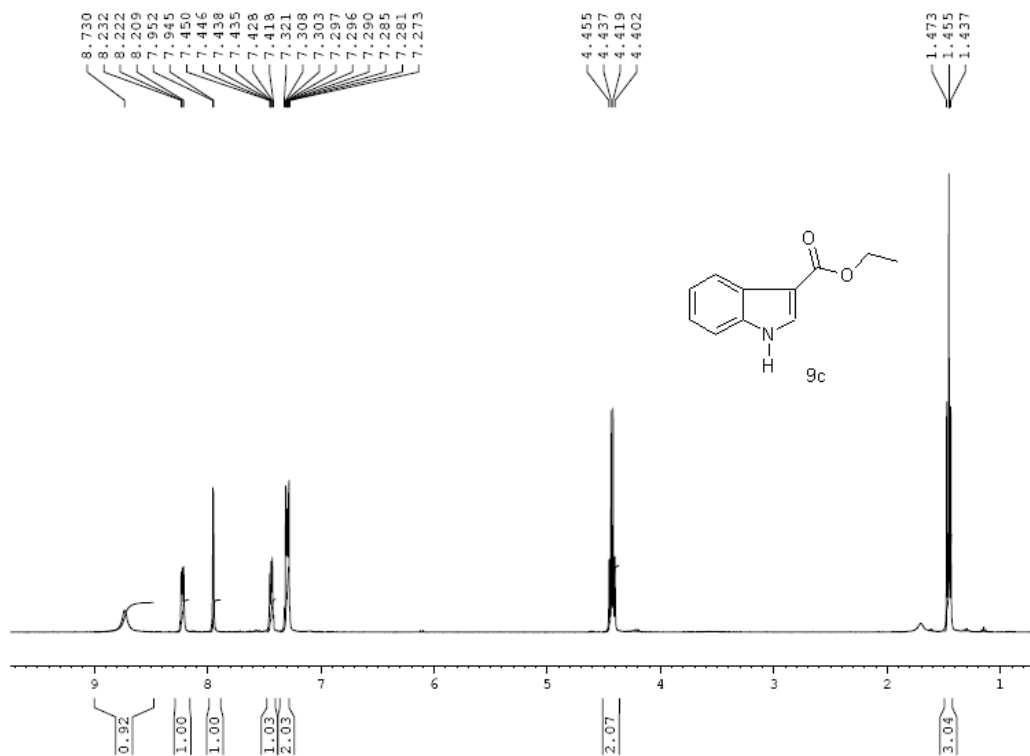Figure S34.  $^{13}\text{C}$ -NMR of 9c.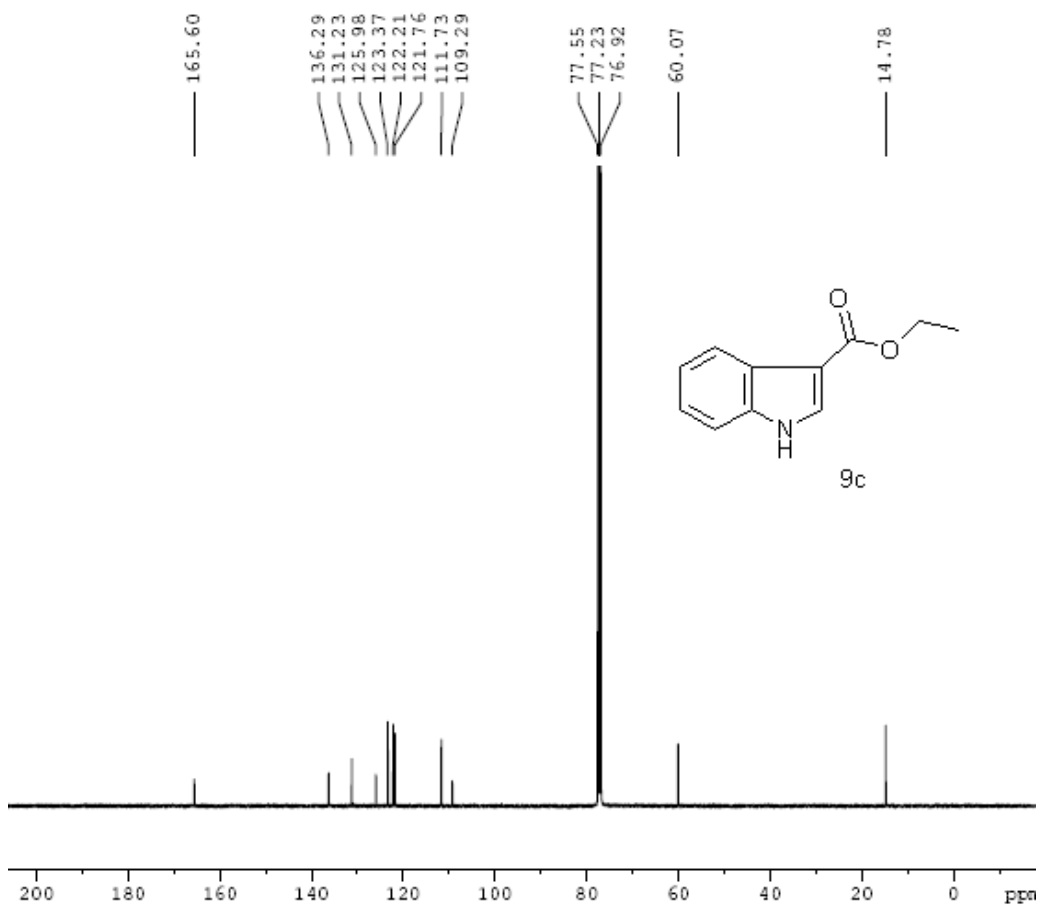

Figure S35.  $^1\text{H}$ -NMR of 9d.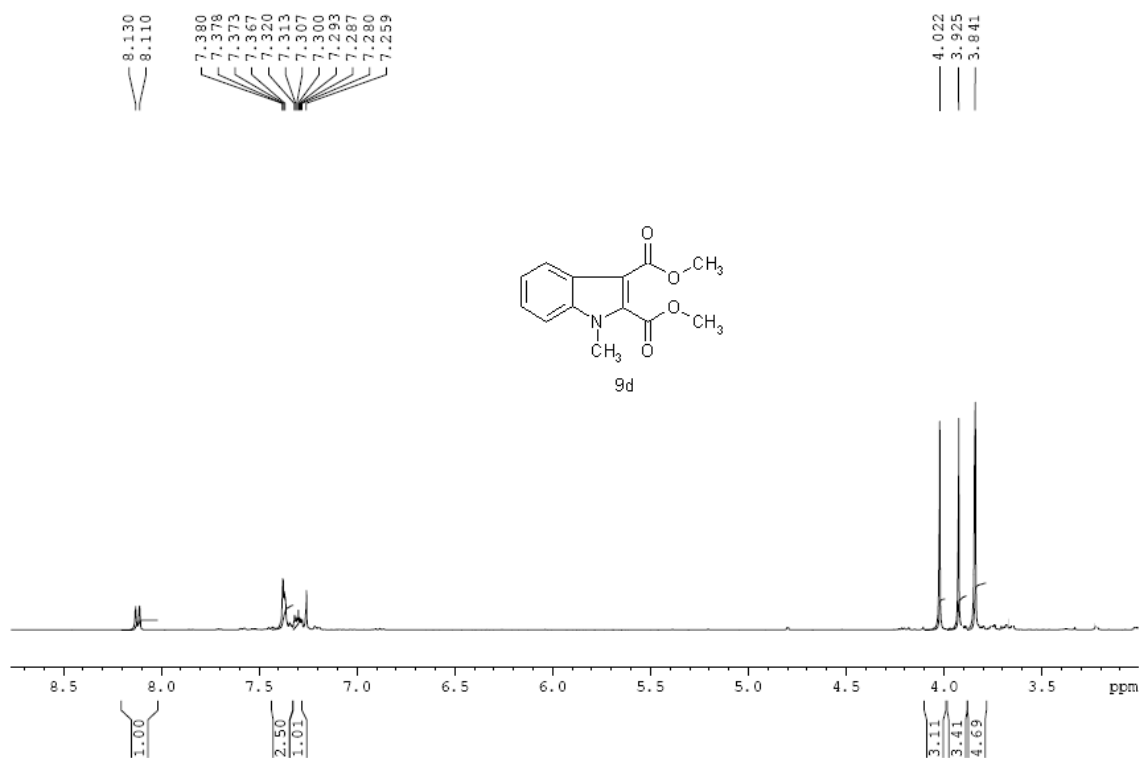Figure S36.  $^{13}\text{C}$ -NMR of 9d.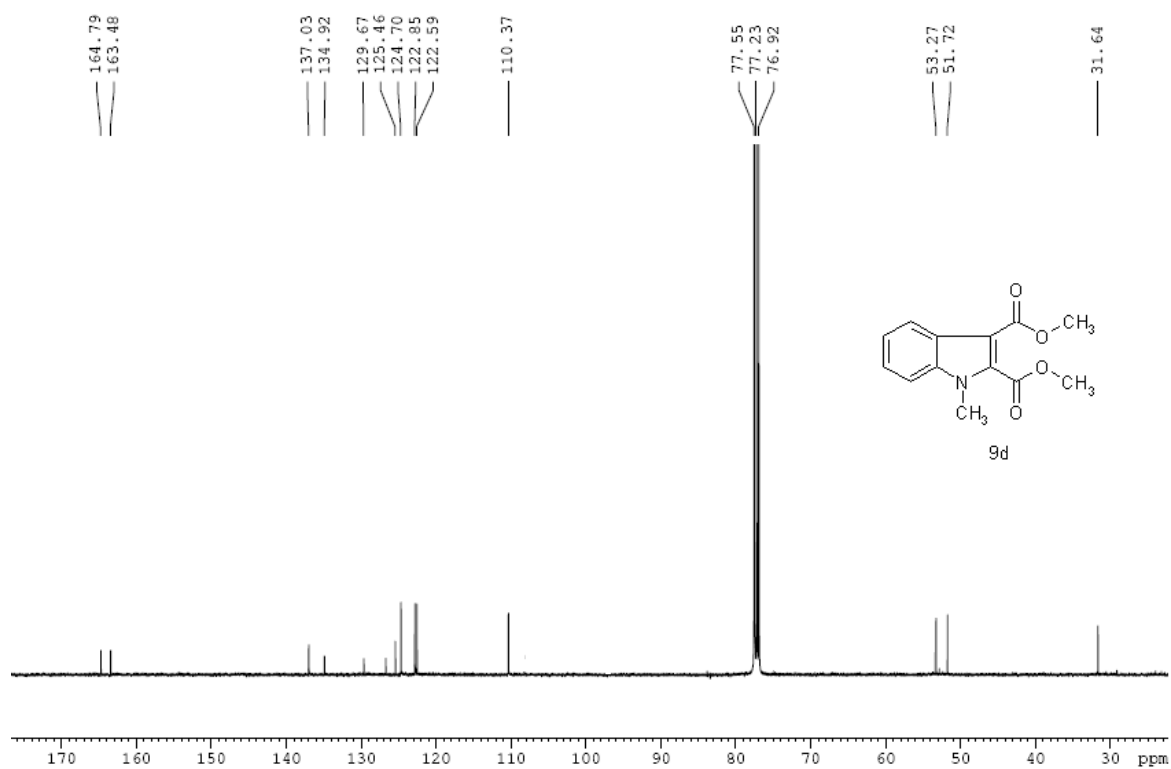

Figure S37.  $^1\text{H}$ -NMR of 9e.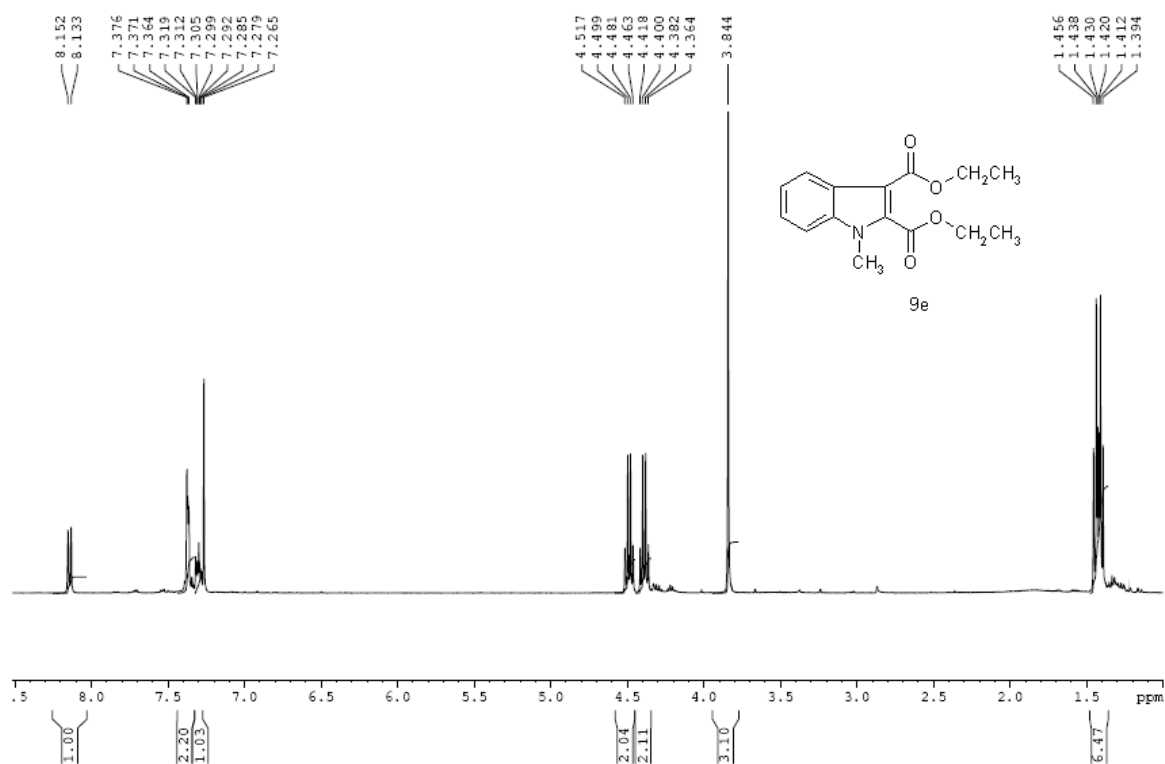Figure S38.  $^{13}\text{C}$ -NMR of 9e.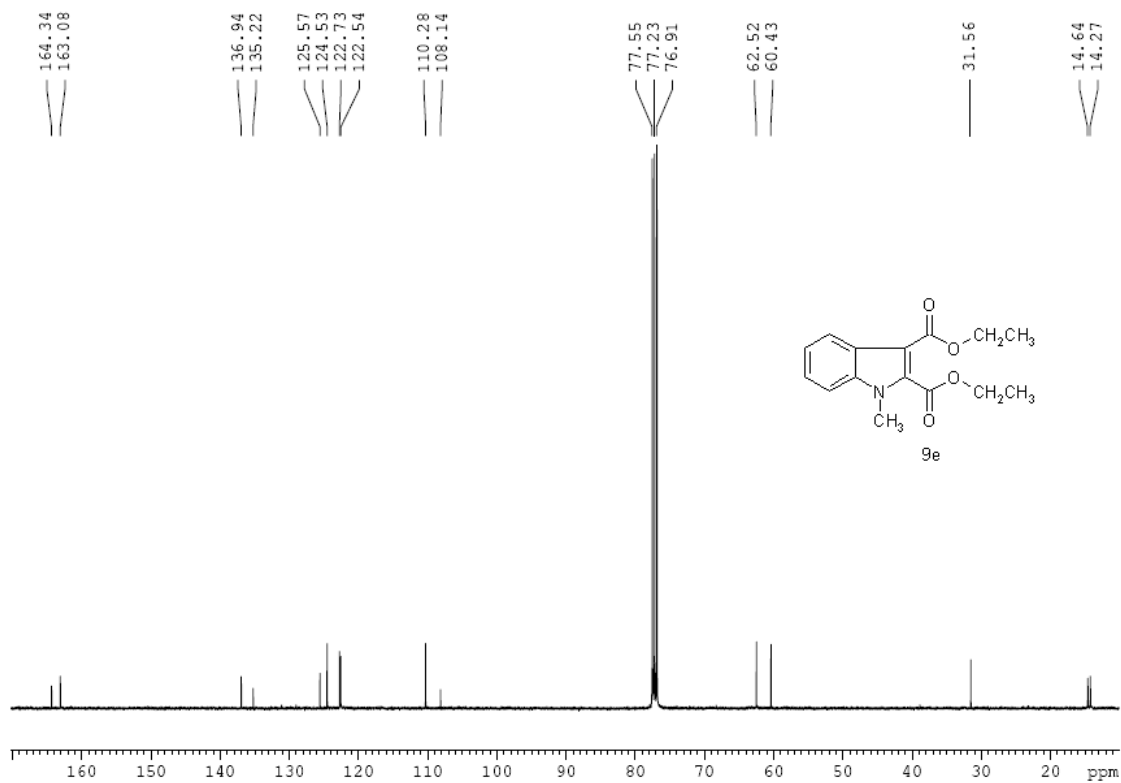

Figure S39.  $^1\text{H}$ -NMR of 10a.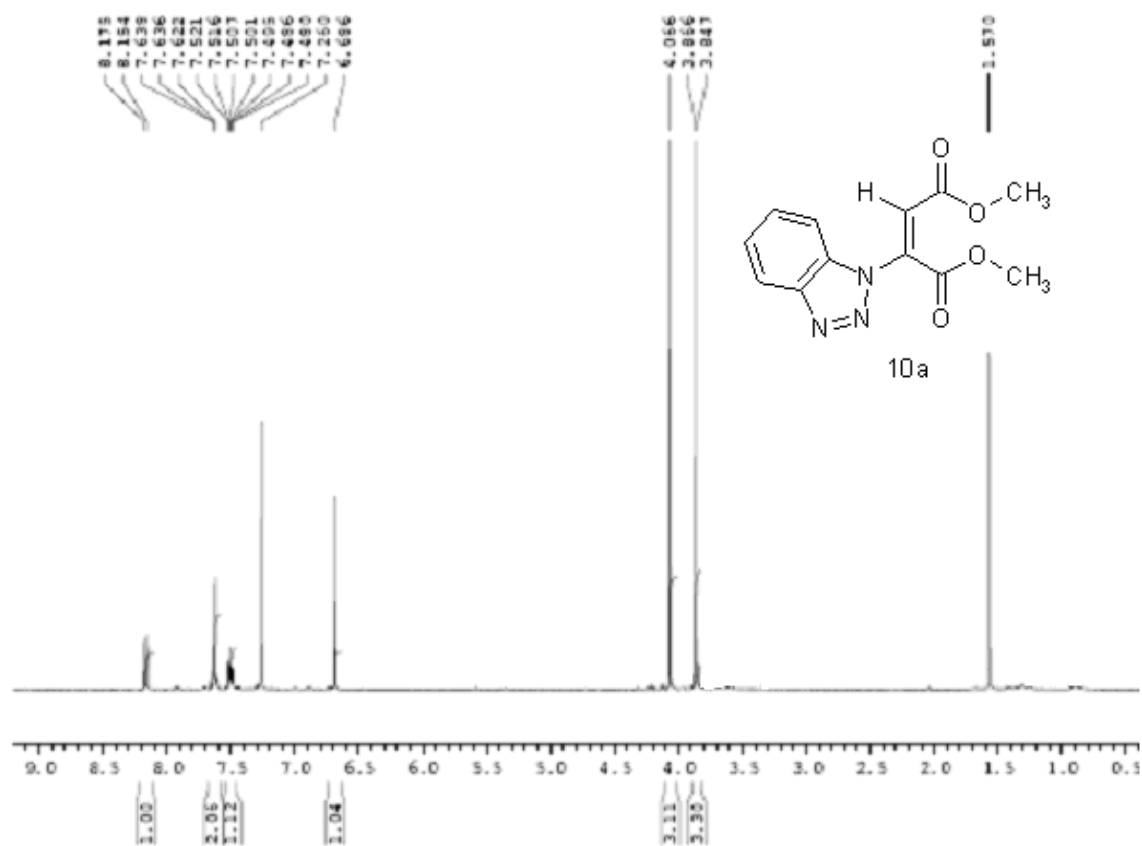Figure S40.  $^{13}\text{C}$ -NMR of 10a.

$^{13}\text{C}$  decoupled Spectra Dr. MAHER C3 in  $\text{CDCl}_3$

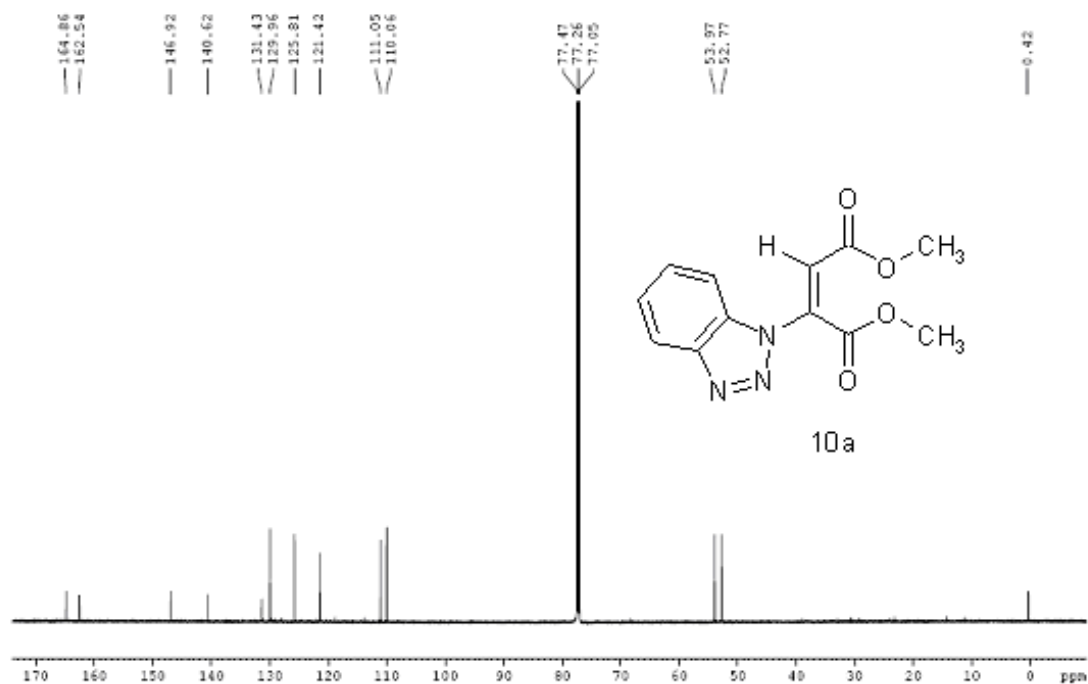

Figure S41.  $^1\text{H}$ -NMR of **10b**.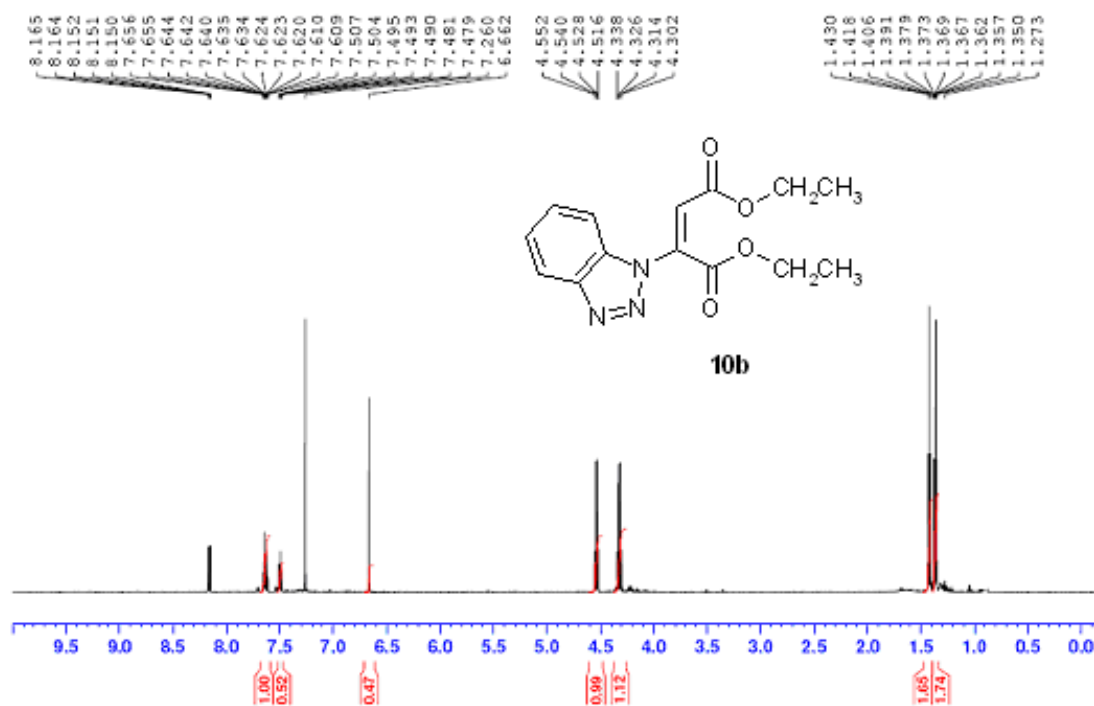Figure S42.  $^{13}\text{C}$ -NMR of **10b**.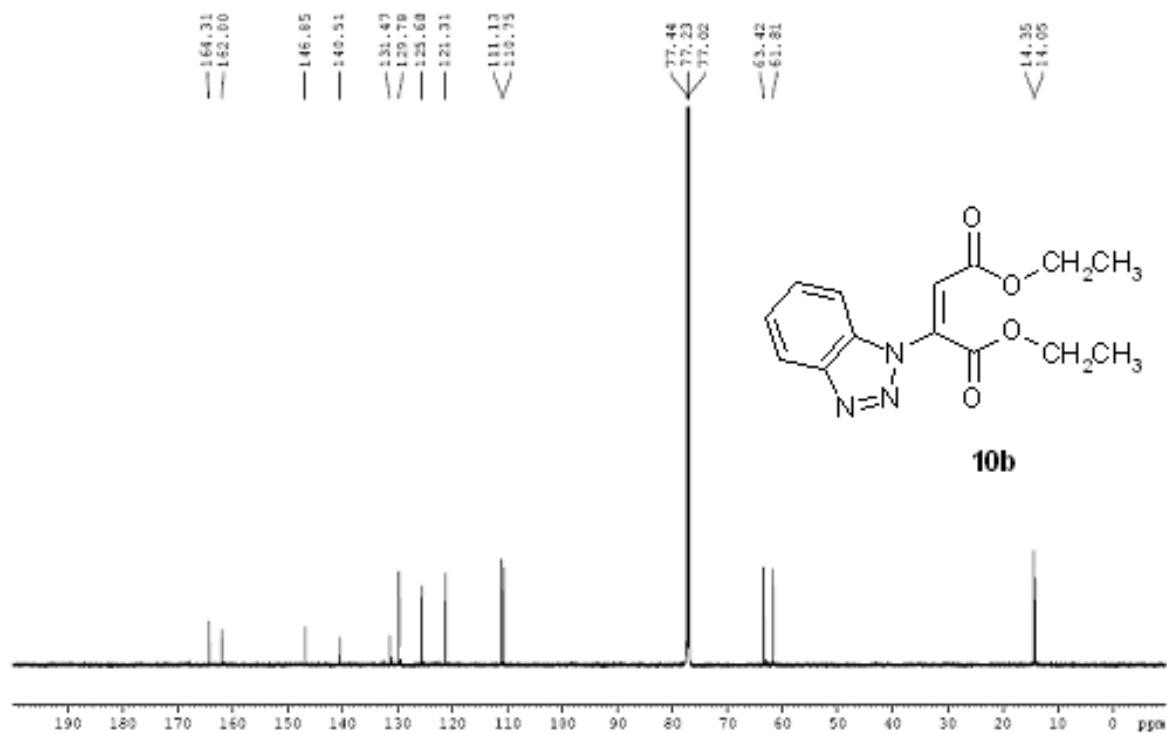

Figure S43.  $^1\text{H}$ -NMR of 11a.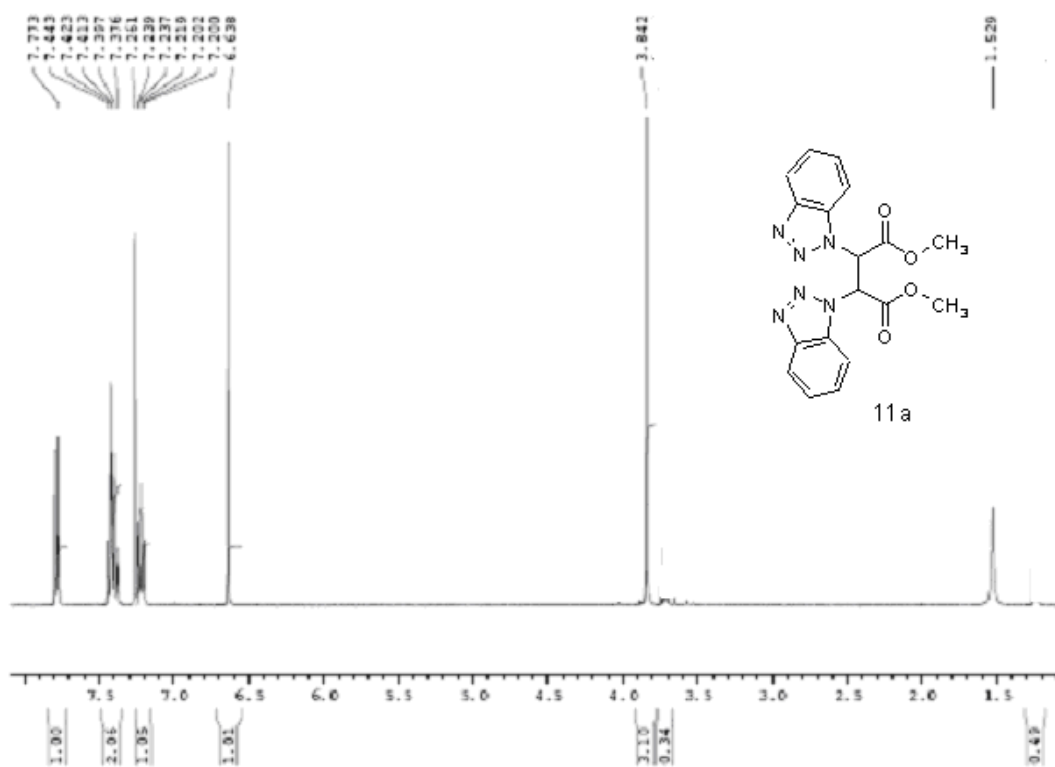Figure S44.  $^{13}\text{C}$ -NMR of 11a.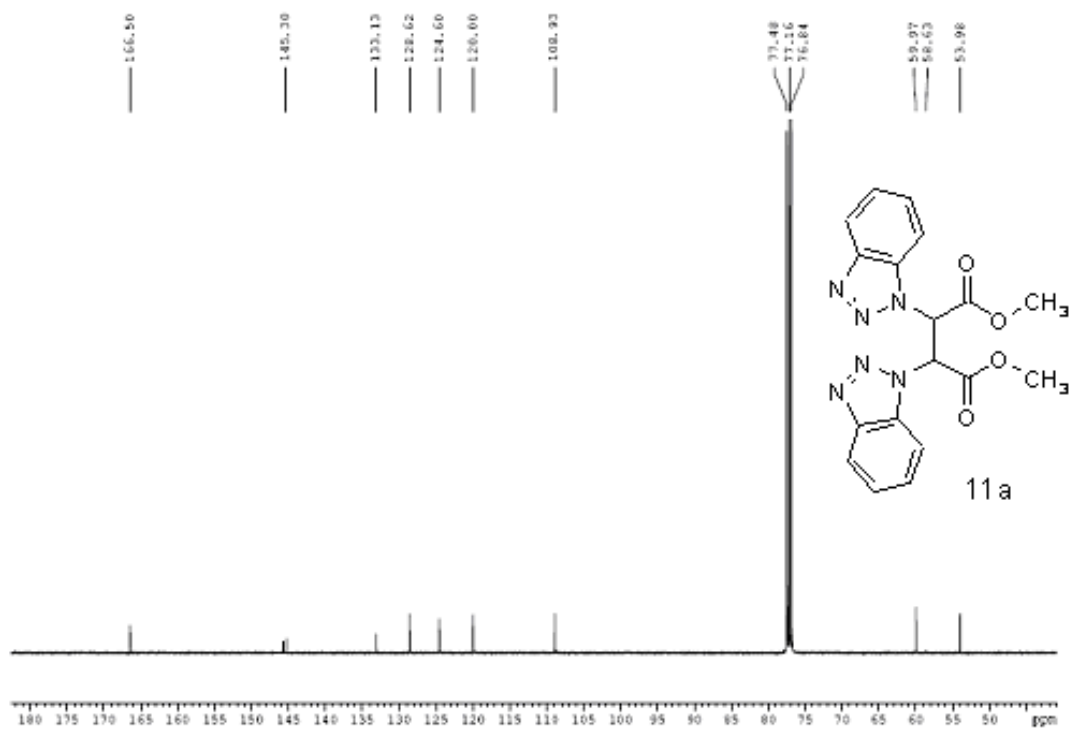

Figure S45.  $^1\text{H}$ -NMR of 11b.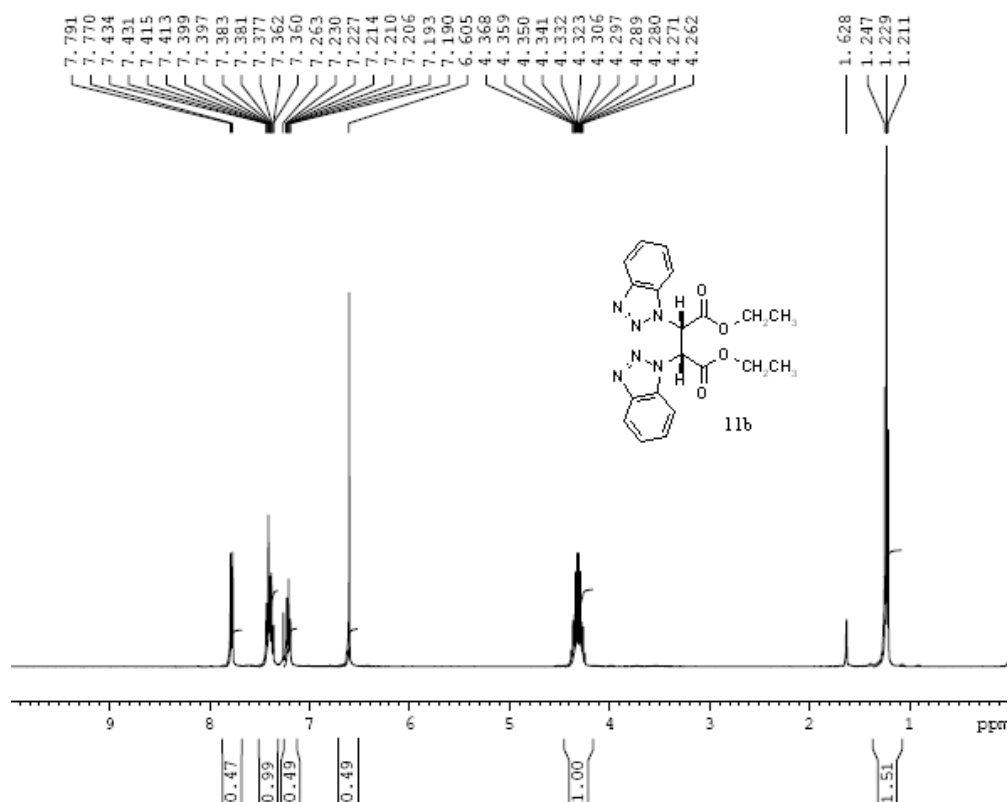Figure S46.  $^{13}\text{C}$ -NMR of 11b.

$^{13}\text{C}$  decoupled spectrum Dr.Maher Ester in  $\text{CDCl}_3$

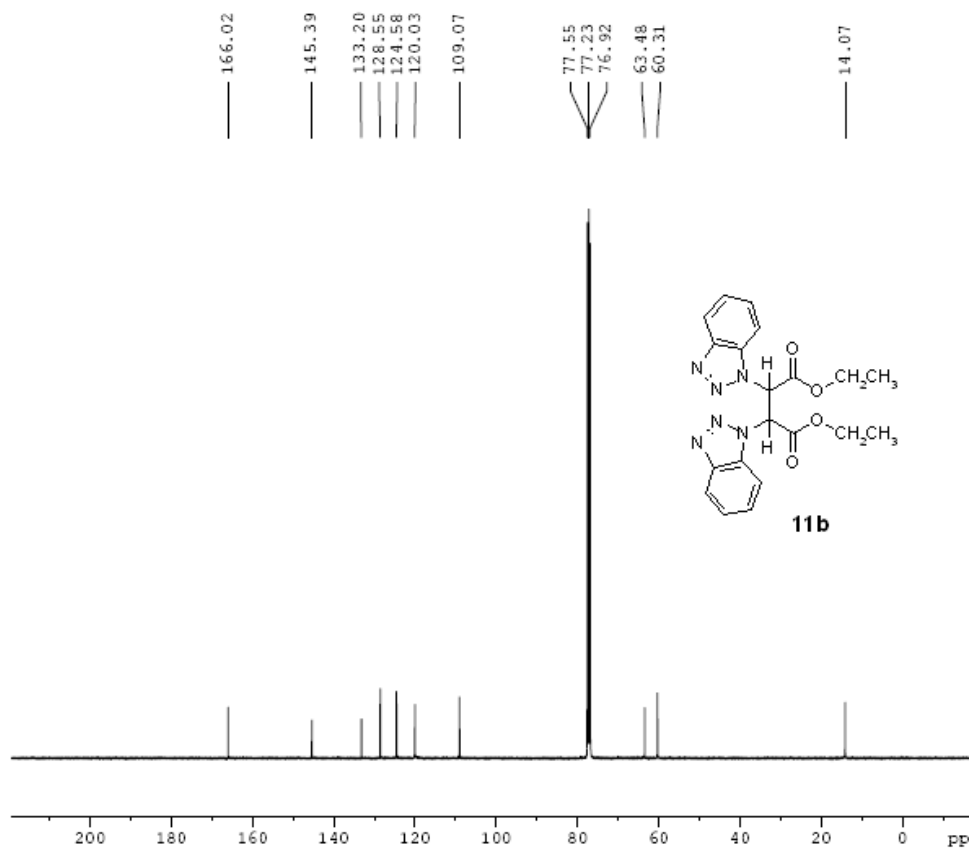

Figure S47.  $^1\text{H}$ -NMR of 12.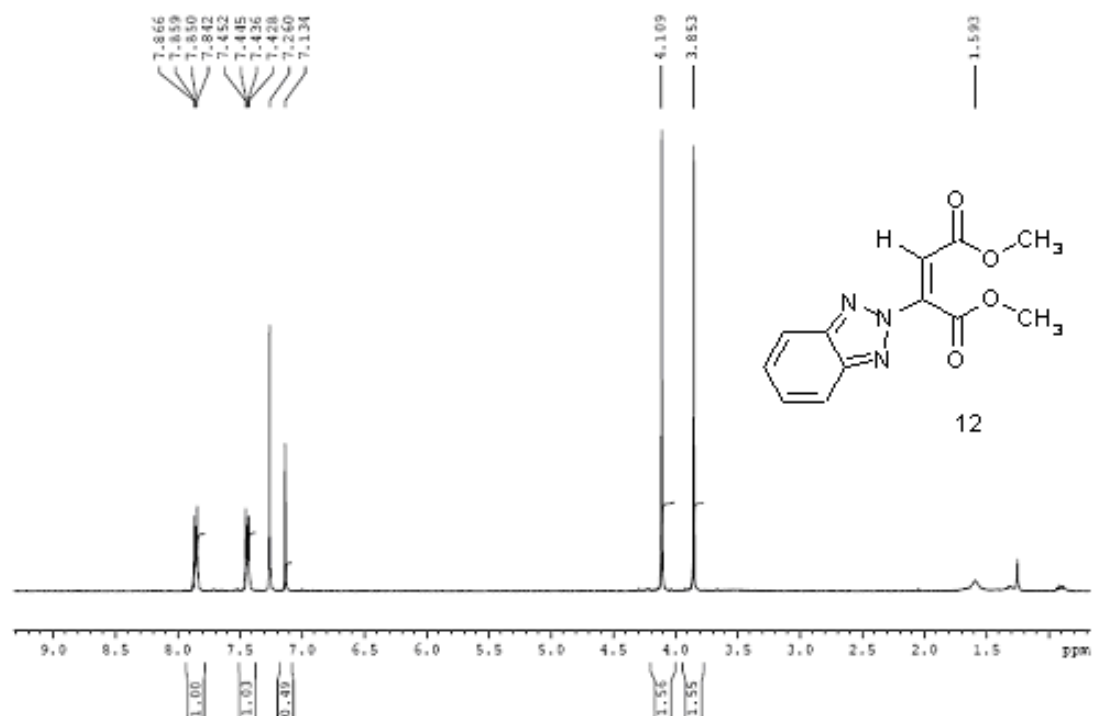Figure S48.  $^{13}\text{C}$ -NMR of 12.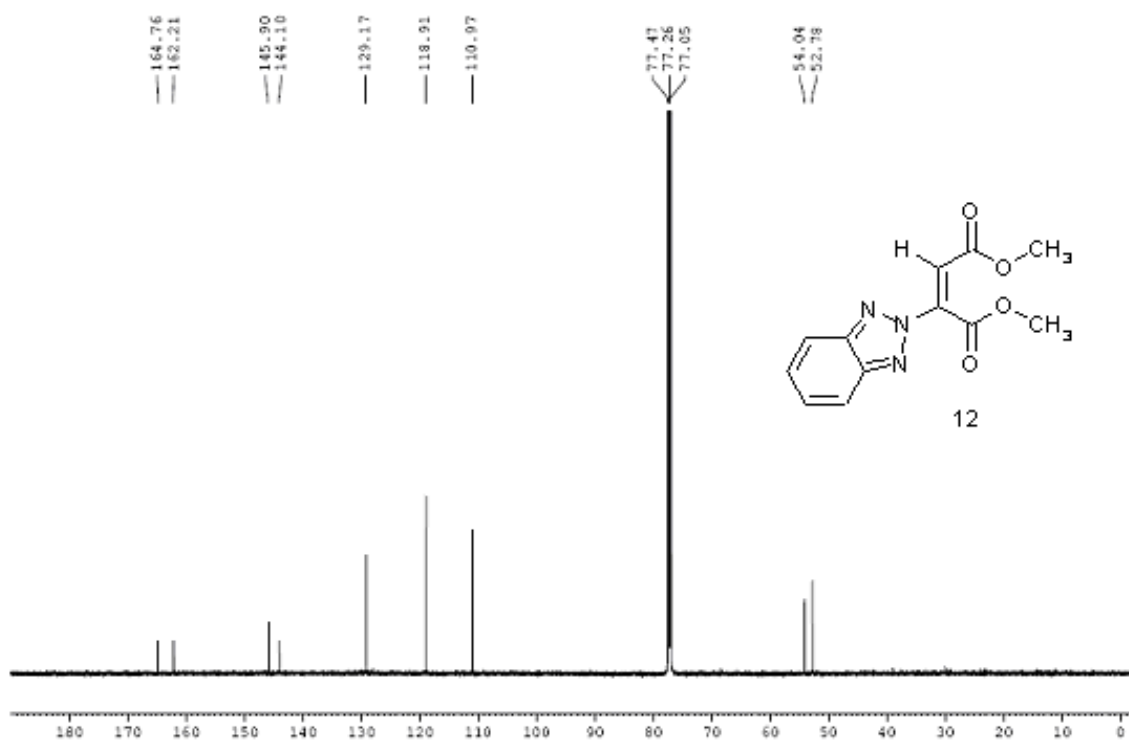



Figure S49. GC-Mass of 4a.

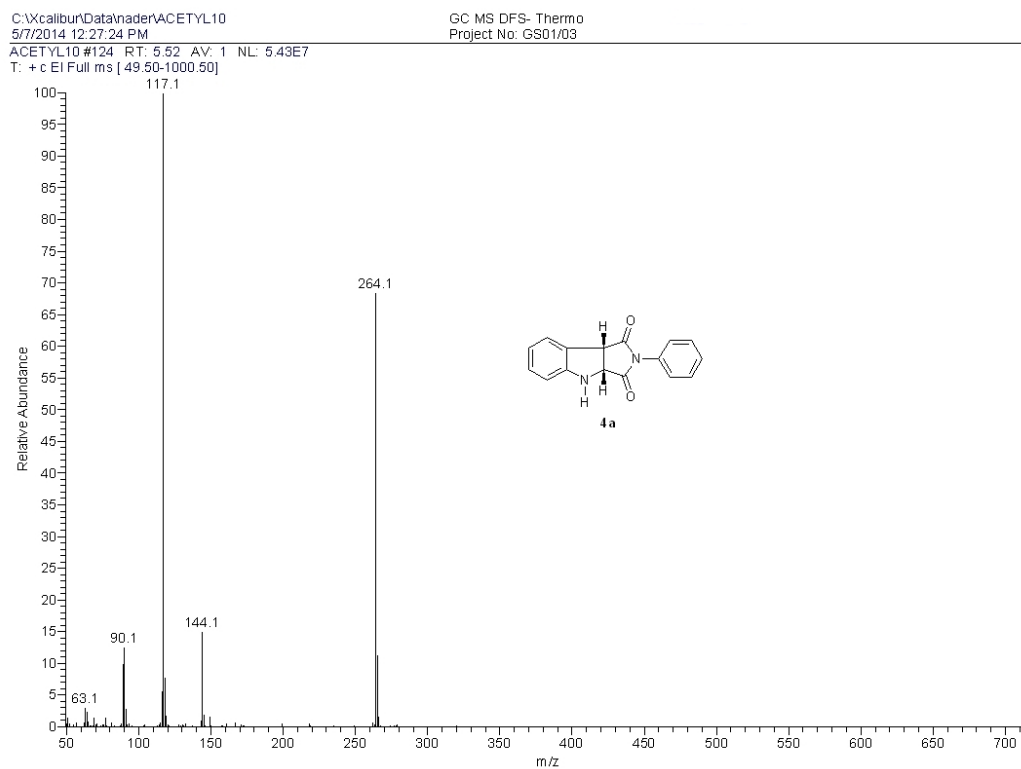

Figure S50. GC-Mass of 4b.

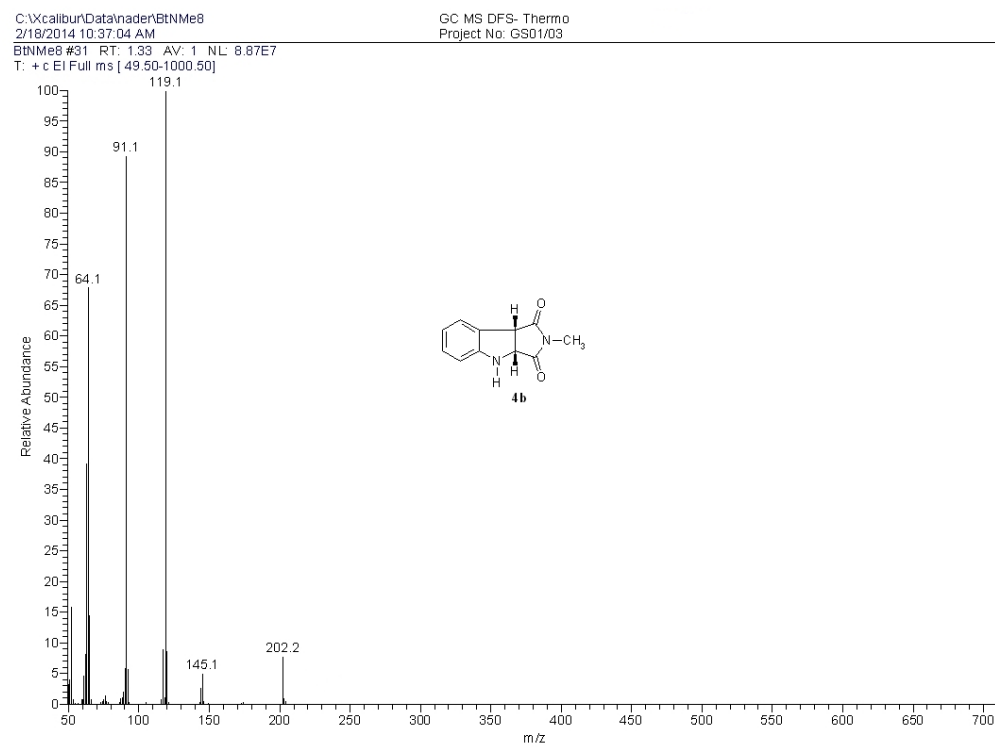

Figure S51. GC-Mass of 4d.

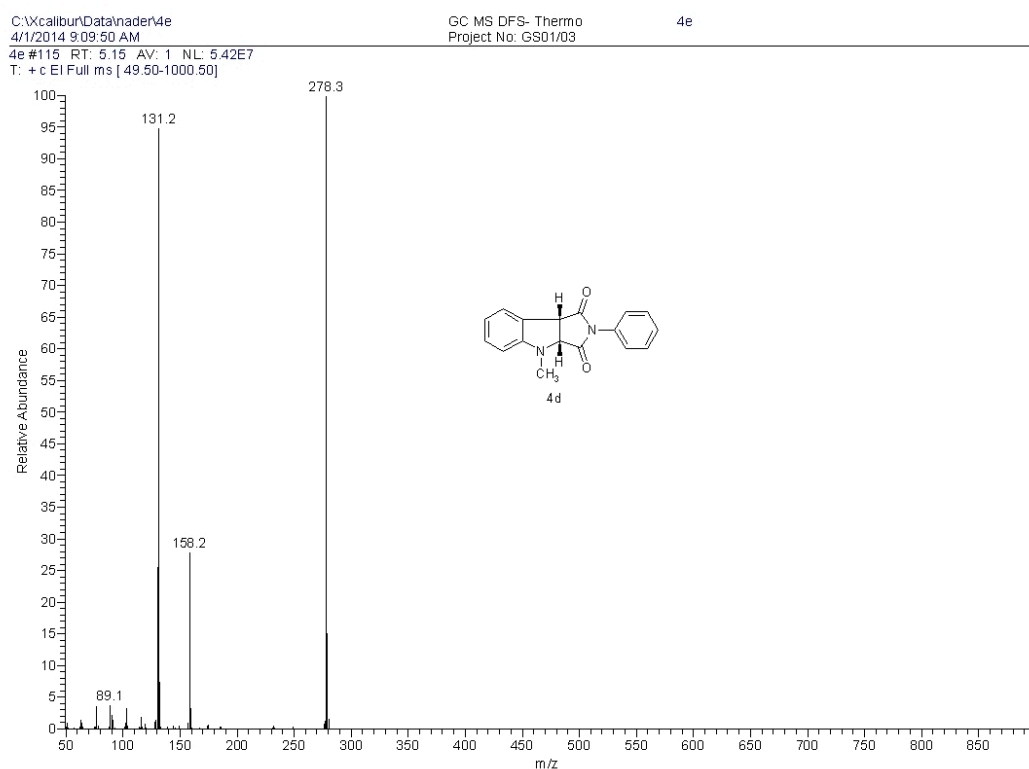

Figure S52. GC-Mass of 4e.

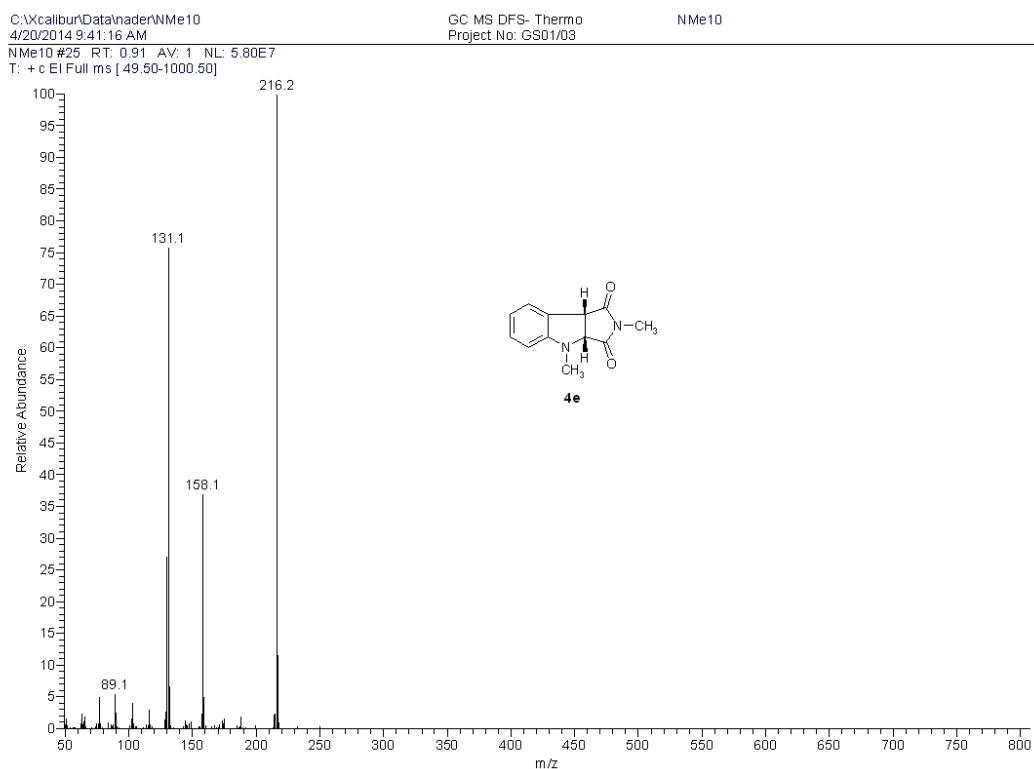

Figure S53. GC-Mass of **4g**.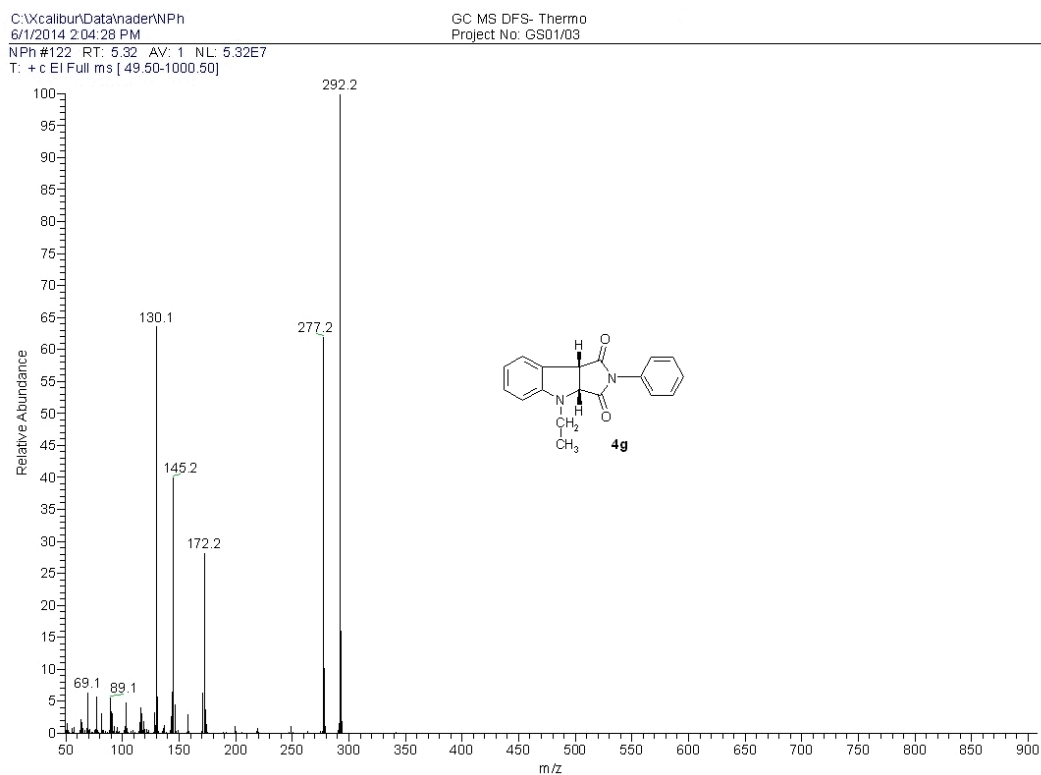Figure S54. GC-Mass of **4h**.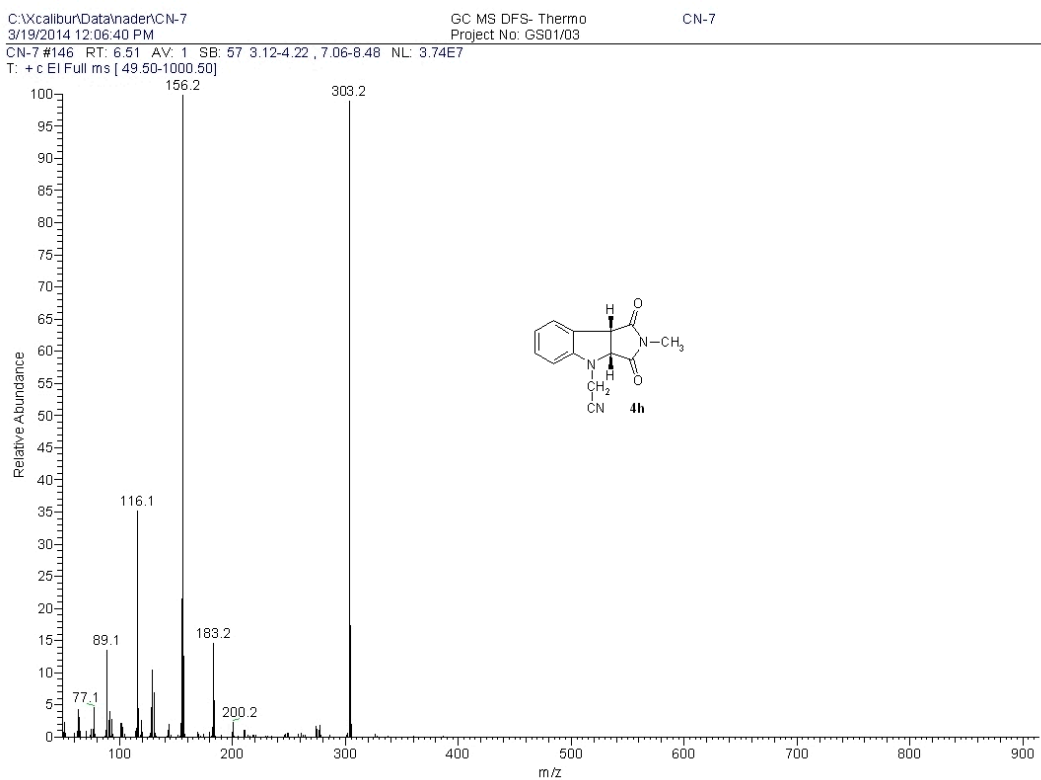

Figure S55. GC-Mass of 4i.

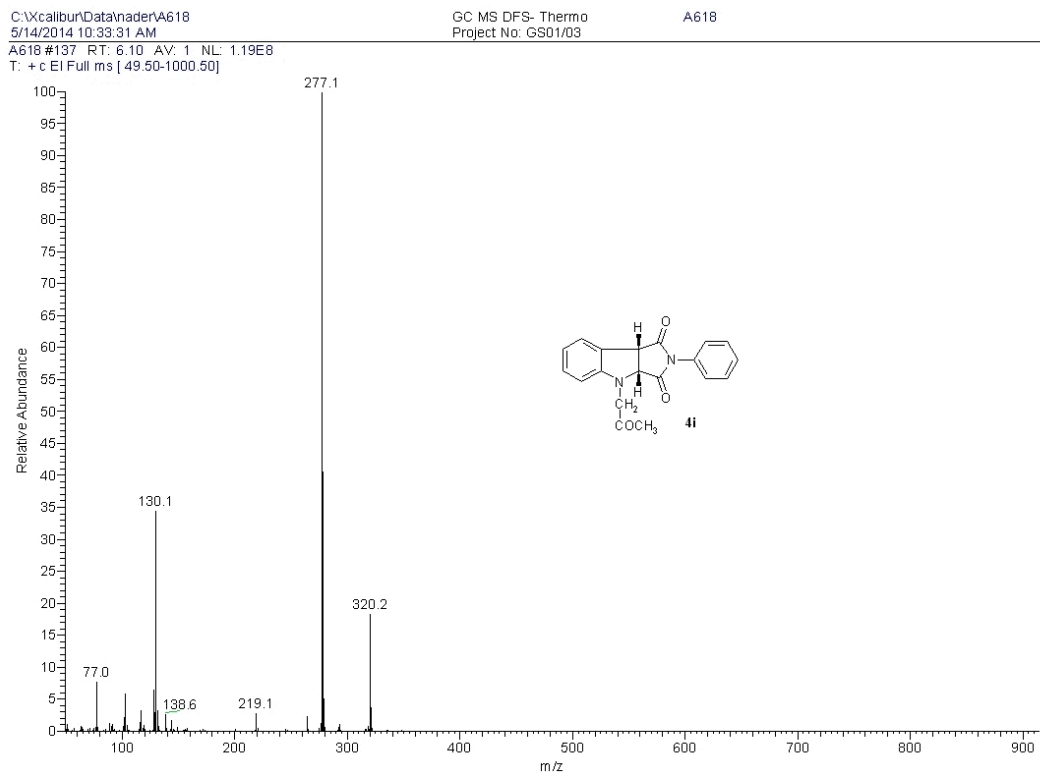

Figure S56. GC-Mass of 5.

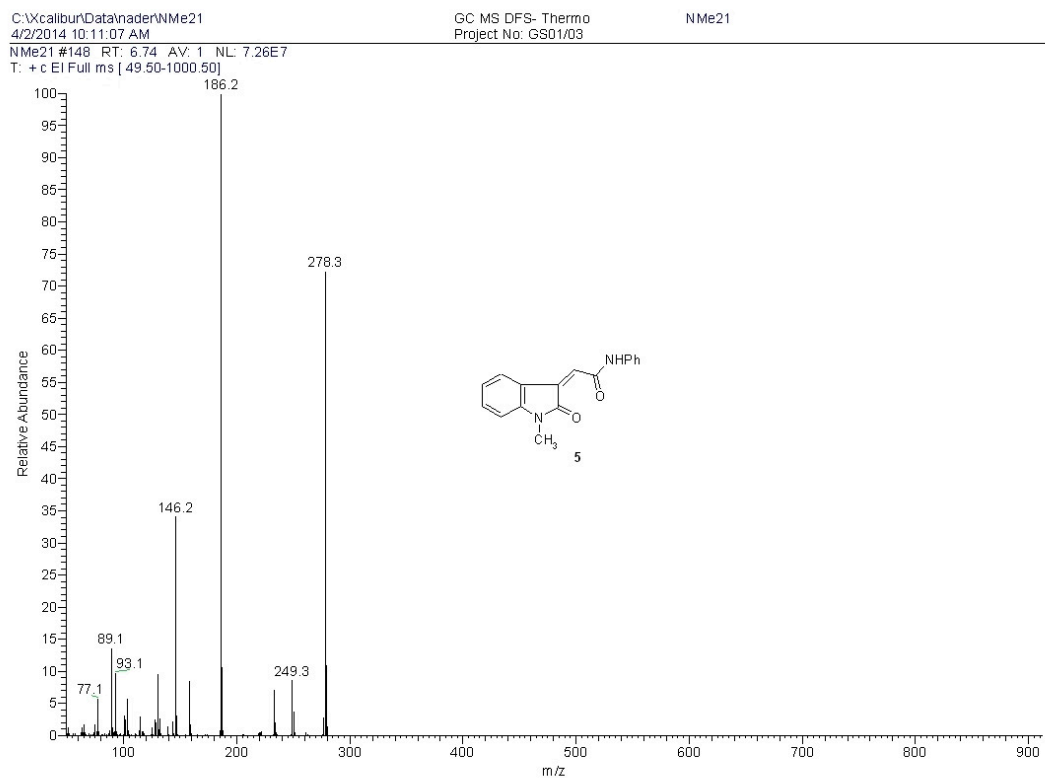

Figure S57. GC-Mass of 6a.

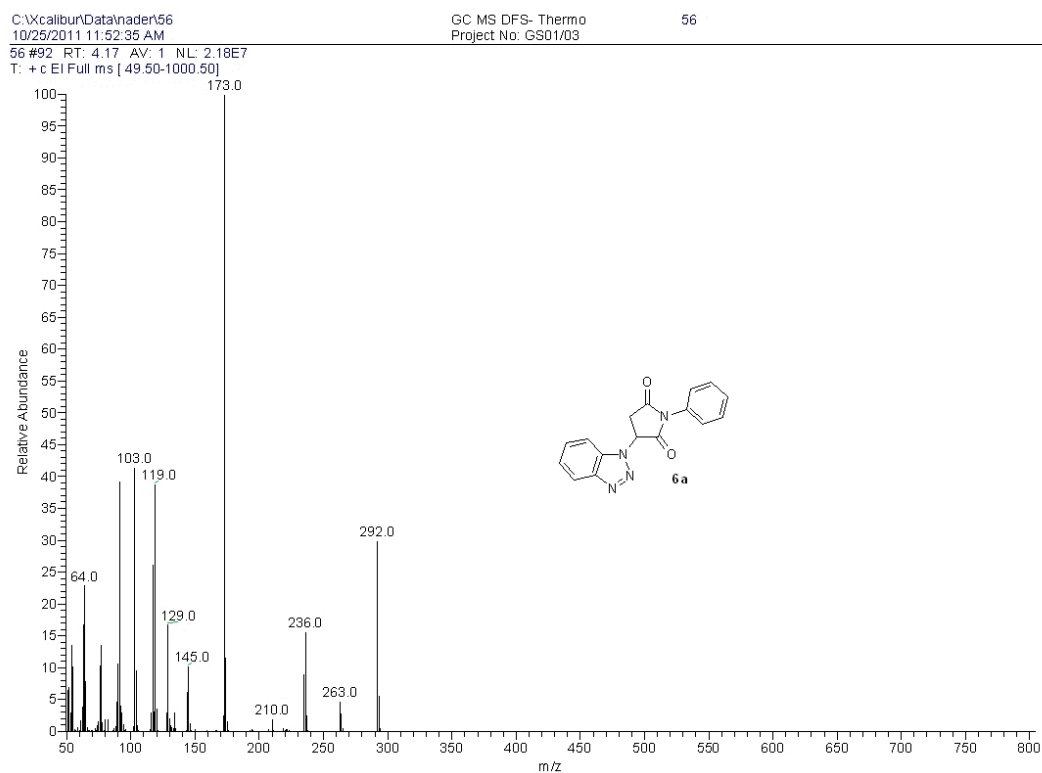

Figure S58. GC-Mass of 6b.

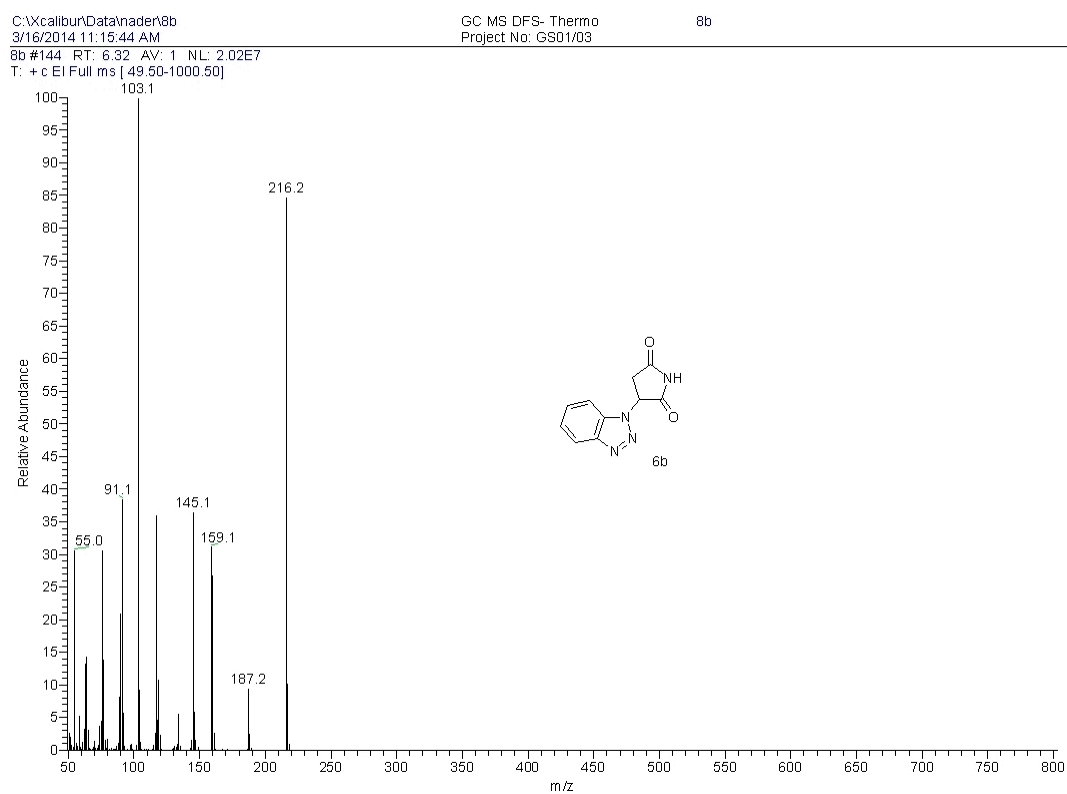

Figure S59. GC-Mass of 7a.

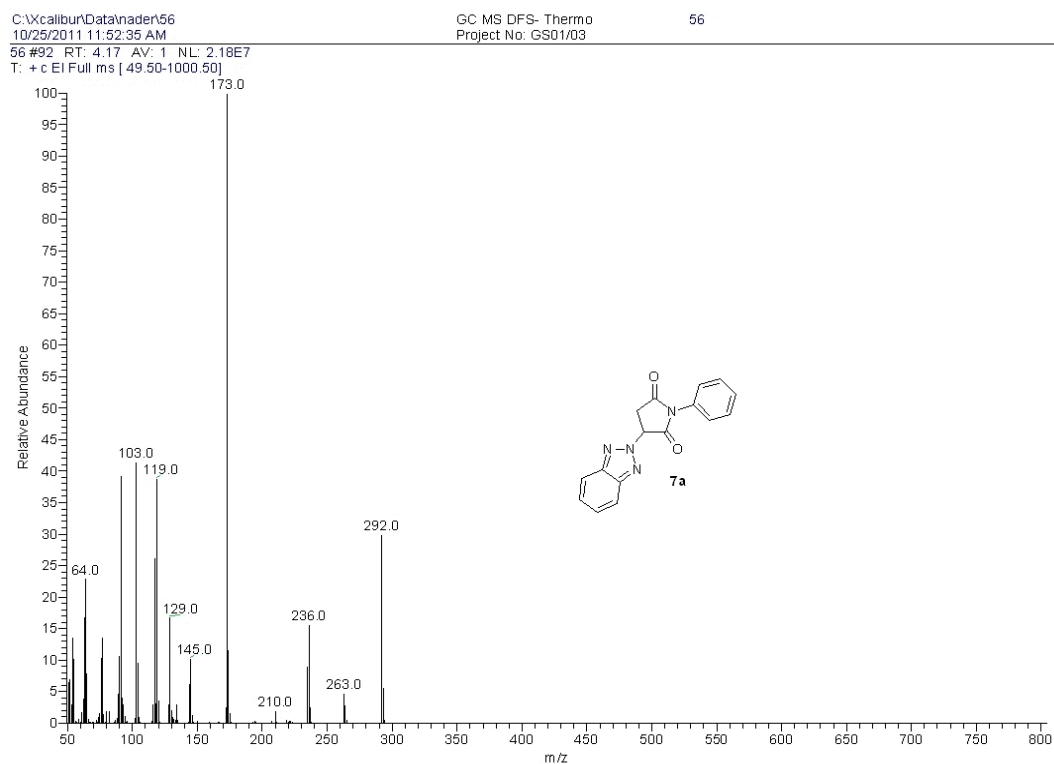

Figure S60. GC-Mass of 7b.

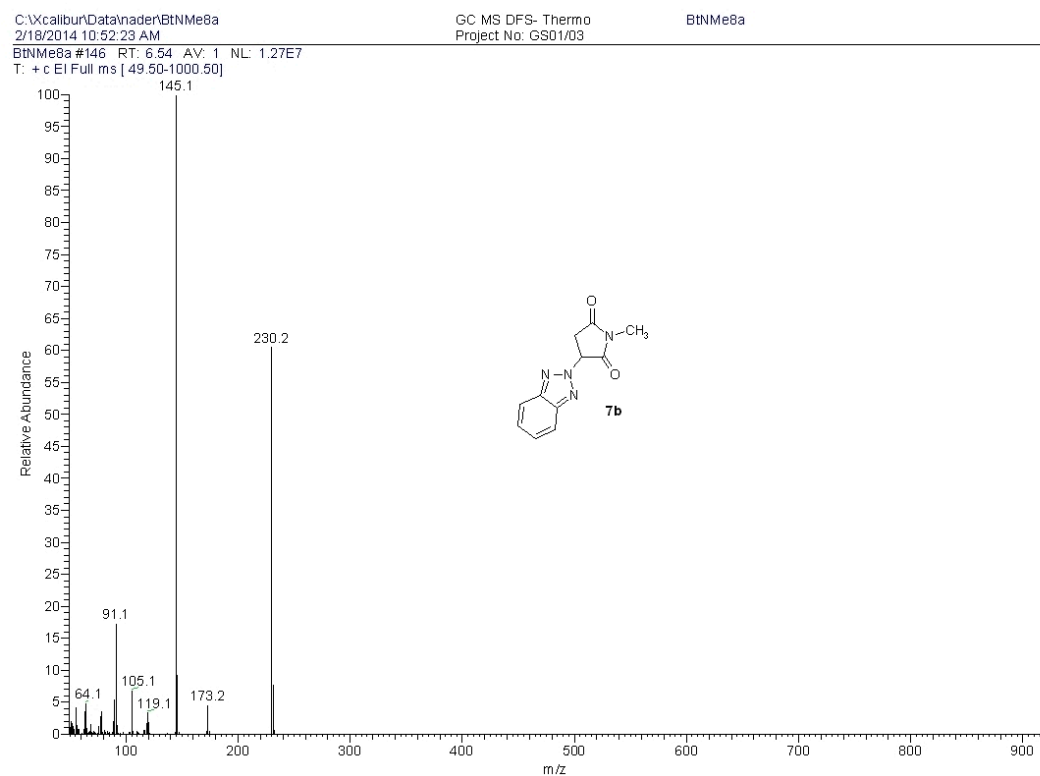

Figure S61. GC-Mass of 9d.

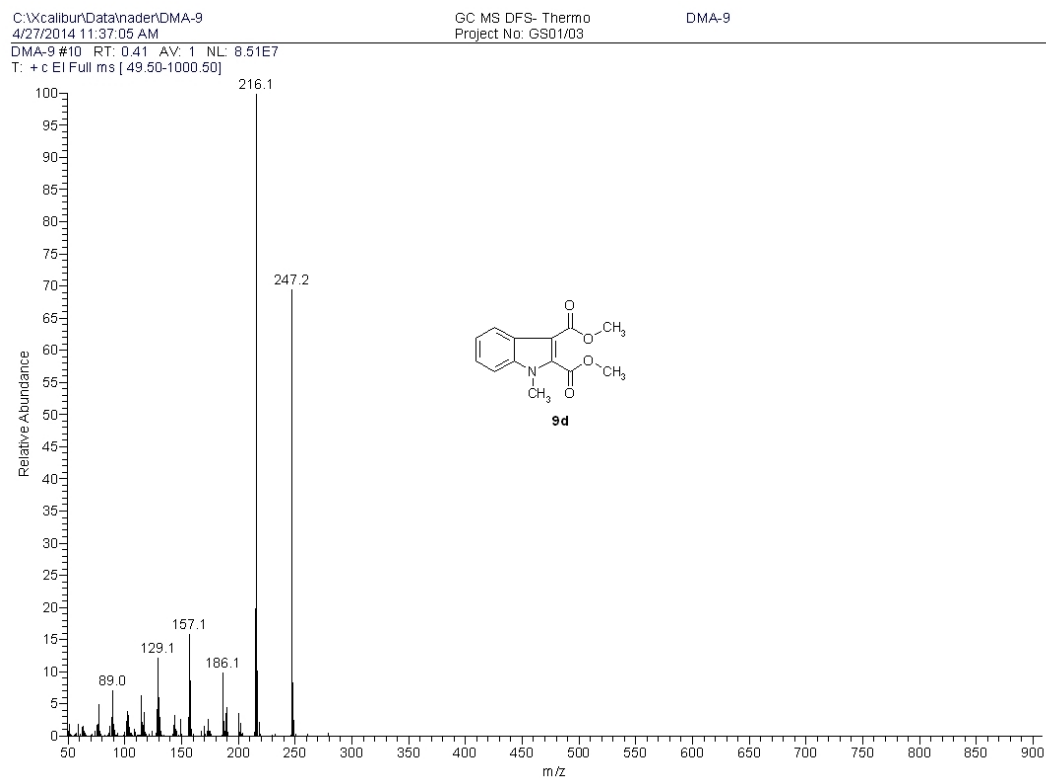

Figure S62. GC-Mass of 9e.

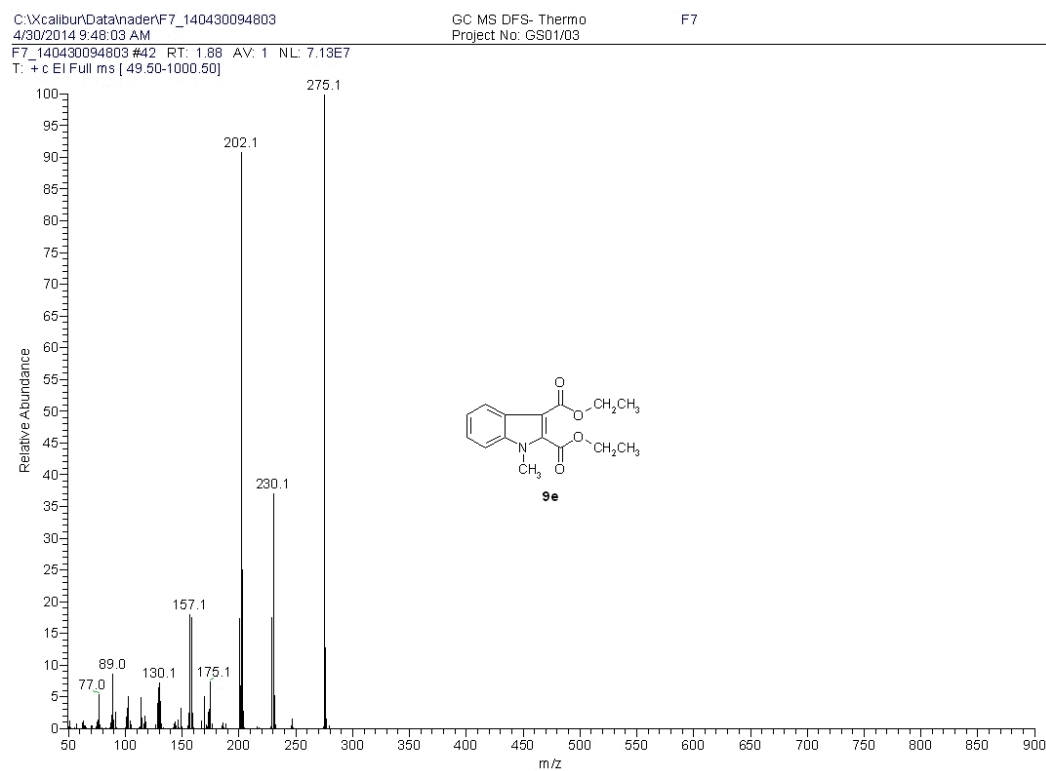

Figure S63. GC-Mass of 11a.

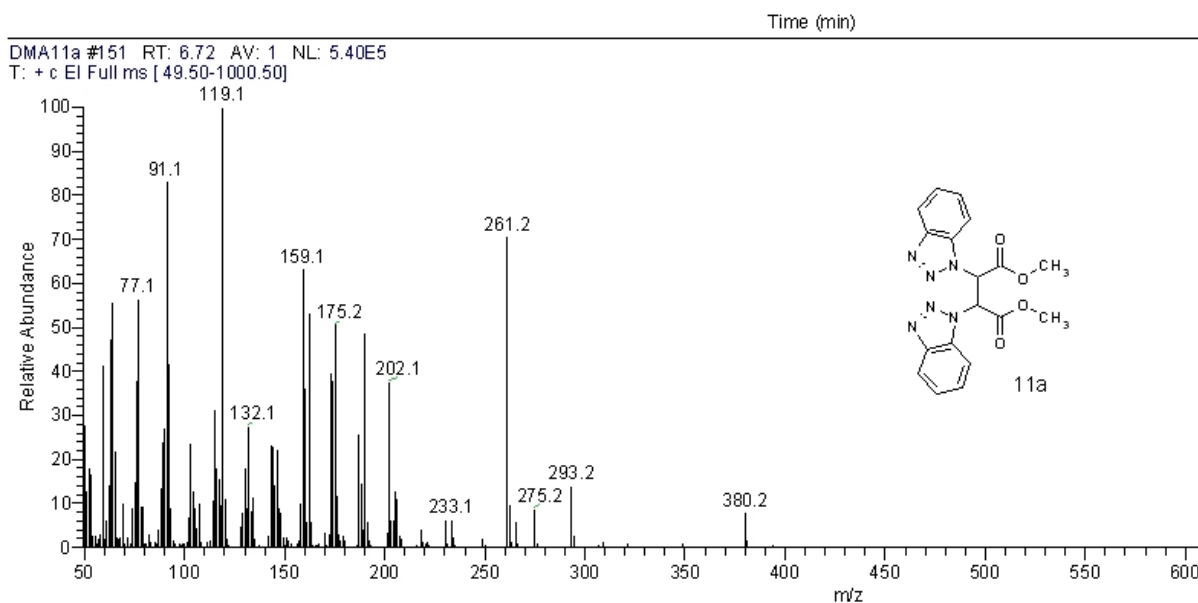

Figure S64. GC-Mass of 11b.

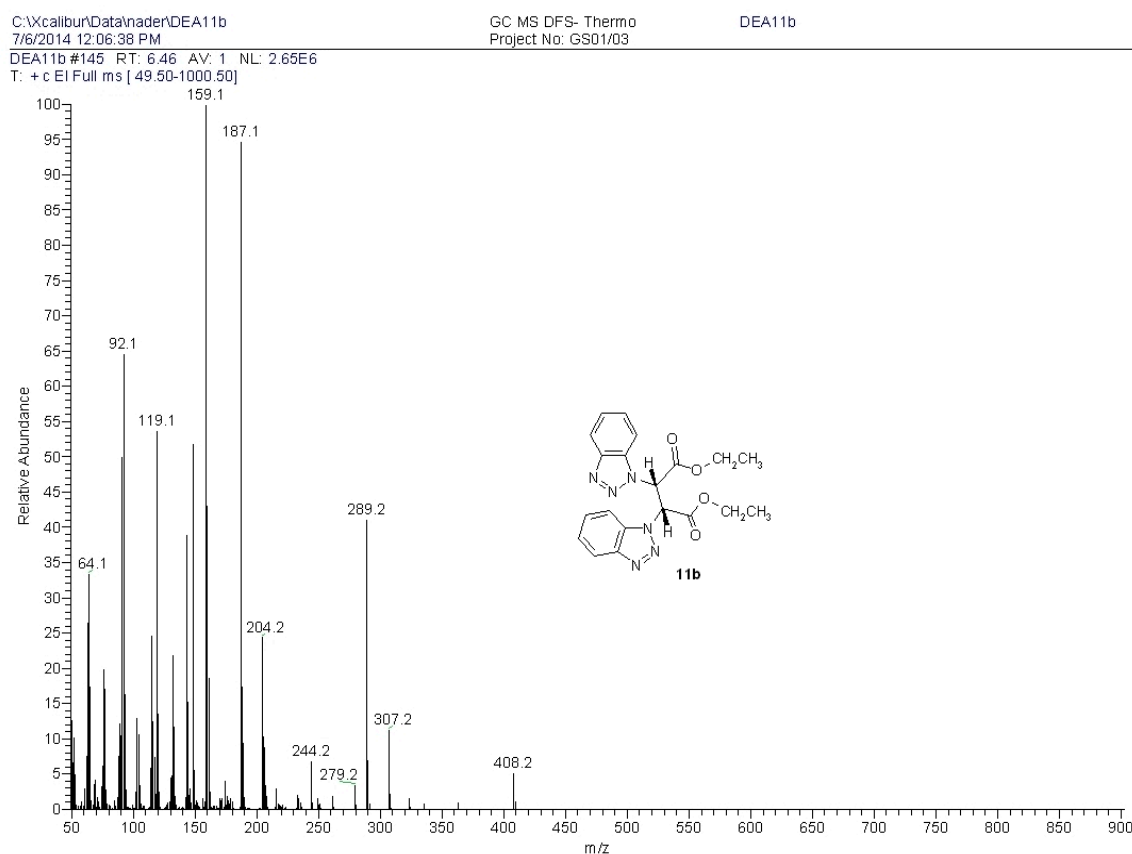



**Figure S65. X-Ray Crystal Structure of 4c.**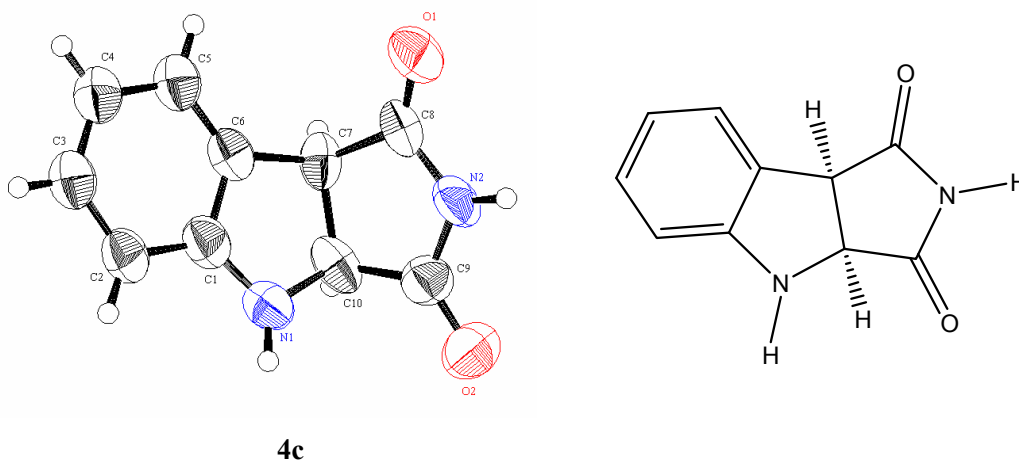**Figure S66. X-Ray Crystal Structure of 4d.**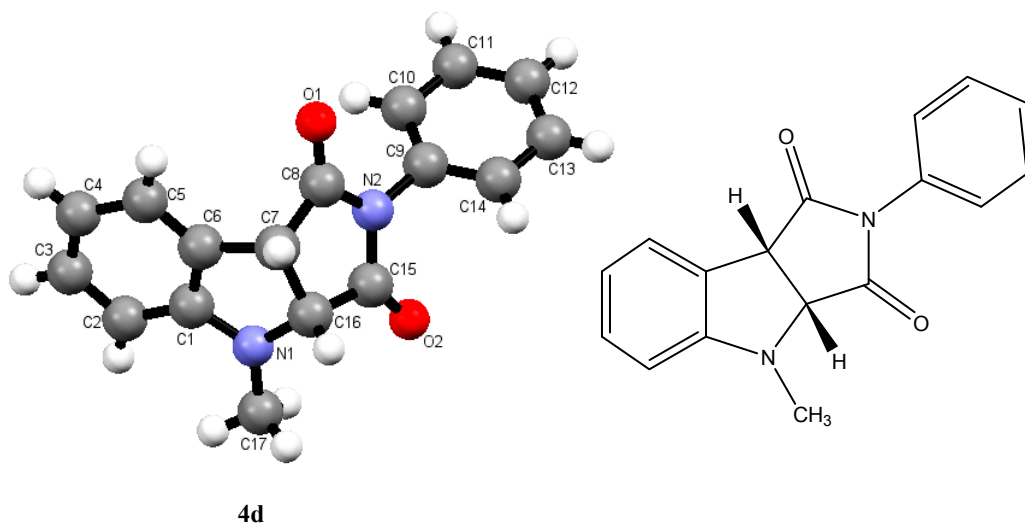**Figure S67. X-Ray Crystal Structure of 4g.**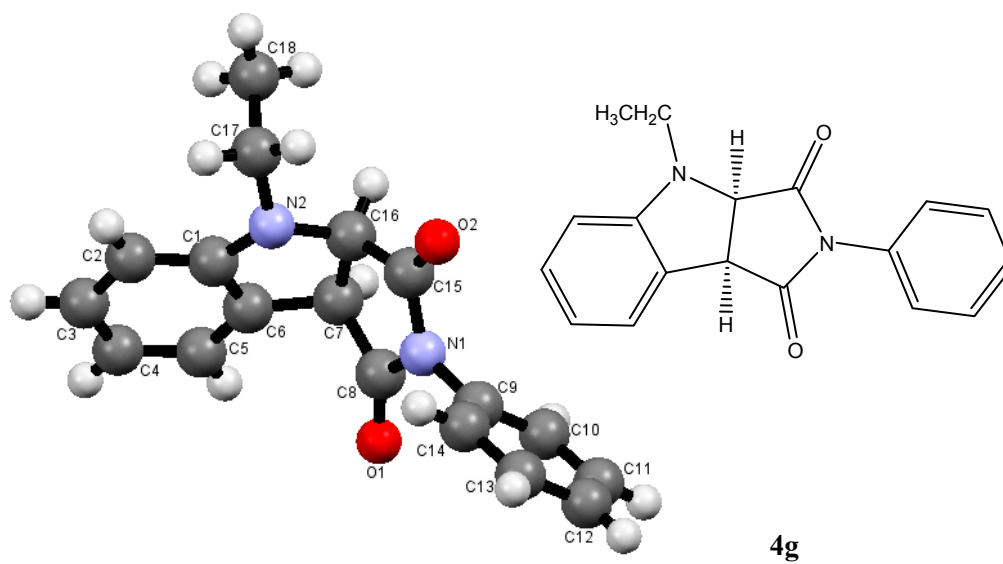

**Figure S68. X-Ray Crystal Structure of 5.**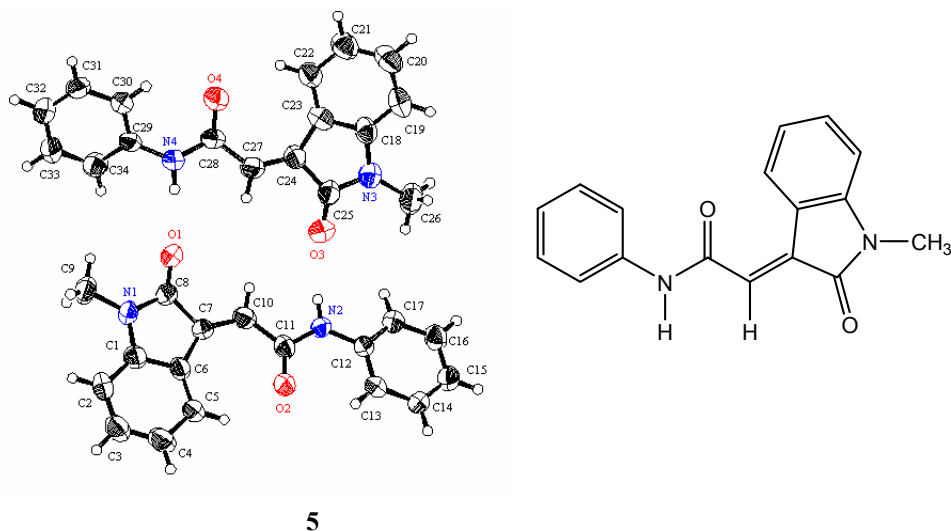**Figure S69. X-Ray Crystal Structure of 6b.**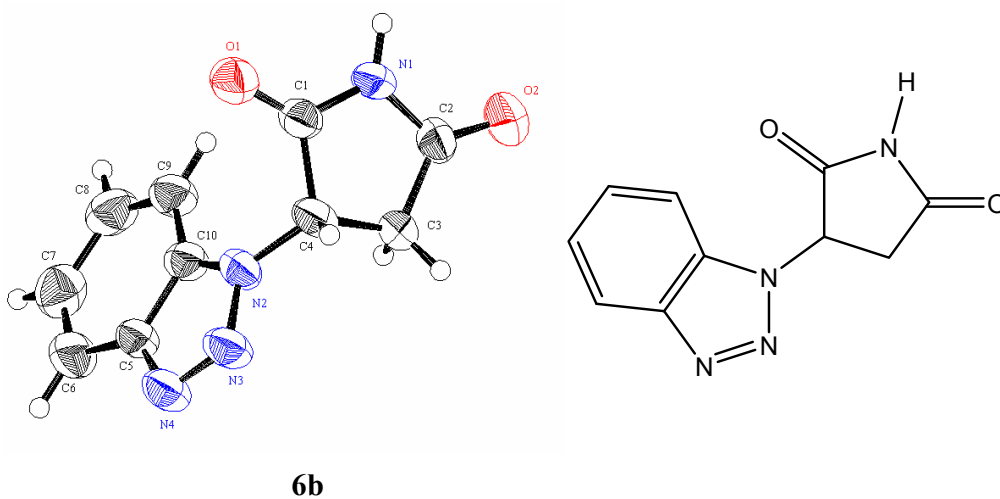**Figure S70. X-Ray Crystal Structure of 11a.**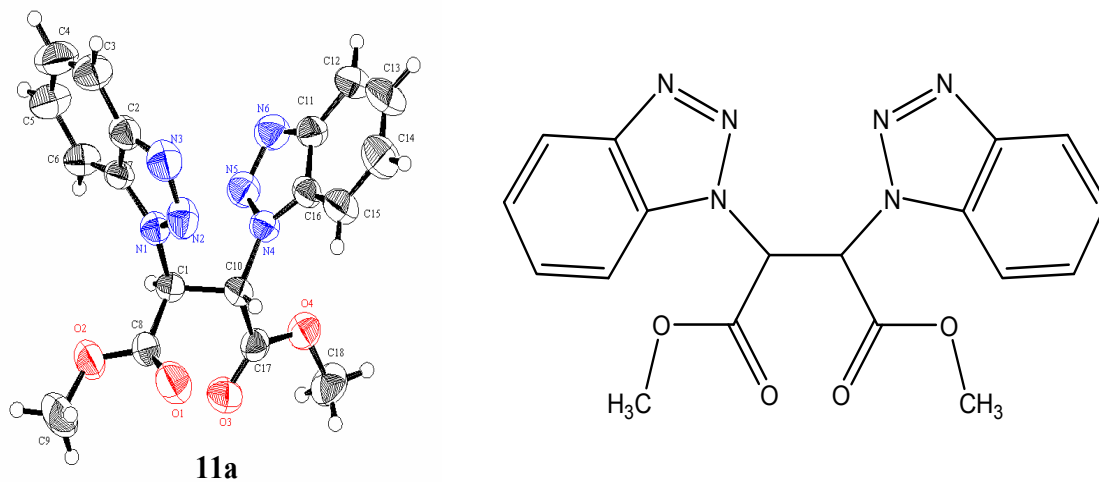

Supplement: s1 [file s1]
